# Supplementary material
Source: PubMed Central journal article supplement (PMC7678446)
Supplement: mmc1.pdf [file mmc1.pdf]

**Molecular Cell, Volume 80**

**Supplemental Information**

**MINERVA: A Facile Strategy for SARS-CoV-2**

**Whole-Genome Deep Sequencing of Clinical Samples**

**Chen Chen, Jizhou Li, Lin Di, Qiuyu Jing, Pengcheng Du, Chuan Song, Jiarui Li, Qiong Li, Yunlong Cao, X. Sunney Xie, Angela R. Wu, Hui Zeng, Yanyi Huang, and Jianbin Wang**

**Molecular Cell, Volume 80**

**Supplemental Information**

**MINERVA: A Facile Strategy for SARS-CoV-2**

**Whole-Genome Deep Sequencing of Clinical Samples**

**Chen Chen, Jizhou Li, Lin Di, Qiuyu Jing, Pengcheng Du, Chuan Song, Jiarui Li, Qiong Li, Yunlong Cao, X. Sunney Xie, Angela R. Wu, Hui Zeng, Yanyi Huang, and Jianbin Wang**

# Supporting Information

## **MINERVA: A facile strategy for SARS-CoV-2 whole genome deep sequencing of clinical samples**

Chen Chen,<sup>1,11</sup> Jizhou Li,<sup>2,11</sup> Lin Di,<sup>3,4,11</sup> Qiuyu Jing,<sup>5,11</sup> Pengcheng Du,<sup>1,11</sup>  
Chuan Song,<sup>1</sup> Jiarui Li,<sup>1</sup> Qiong Li,<sup>2</sup> Yunlong Cao,<sup>3</sup> X. Sunney Xie,<sup>3</sup> Angela  
R. Wu,<sup>5,6,\*</sup> Hui Zeng,<sup>1,\*</sup> Yanyi Huang,<sup>3,7,8,9,\*</sup> and Jianbin Wang<sup>2,9,10,12,\*</sup>

Lead Contact: Jianbin Wang ([jianbinwang@tsinghua.edu.cn](mailto:jianbinwang@tsinghua.edu.cn))

Supporting Materials:

Figures S1-S7

Table S1-S4

**Figure S1, related to Figure 1. Comparison between MINERVA and the conventional dsDL strategy.** Cost of highly multiplexed PCR approach is also shown as reference. MINERVA has advantages of less hands-on time and lower cost compared to dsDL, as MINERVA is a simpler procedure and requires much lower sequencing depth (up to 8Gbp for each MINERVA-m or -e sample while ~100Gbp for each dsDL sample). Though highly multiplexed PCR costs even lower, it is generally accepted that it cannot give metagenomics data and is prone to generate bias for samples with SNV. (B-E) Effect of N10 primer during reverse transcription and Tn5 amount on ribosomal rate, insert size, and gene body coverage evenness.

**Figure S2, related to Figure 3. Quality assessment of MINERVA-m data.** (A) Amount of sequencing data for different libraries. (B and C) Comparison between MINERVA-m and dsDL libraries on bacterial species richness (B) and shannon index (C). (D-F) Comparison of microbial composition of pharyngeal (D), sputum (E) and stool (F) samples profiled by metagenomic and assembly strategies.

**Figure S3, related to Figure 3. Metagenomics analysis of COVID-19 samples using MINERVA.** (A) Microbial composition of non-template controls (NTCs) based on bacterial genus, fungal genus and viral family. (B) Kruskal-Wallis test was used for the comparison of species richness between NTCs and patient samples. (C) PERMANOVA analysis to assess factors associated with microbial compositions in all samples (PERMANOVA test, \* $p < 0.05$ , \*\* $p < 0.01$ , \*\*\* $p < 0.001$ ). (D) PCoA analysis based on Bray-Curtis distance of sputum samples, including Healthy controls (n=8), mild (n=8), moderate (n=33), severe (n=9), critical (n=1) patient samples and non-template controls (NTC, n=2). Patient samples were significantly different from healthy controls ( $p < 0.001$  by PERMANOVA test). (E) Wilcoxon rank-sum test was used for the comparison of alpha diversity between Healthy controls (n=8) and Patient sputum samples (n=51). Decreased Shannon index was observed in patient samples. (F) Multivariate analysis (by MaAsLin linear model) to determine taxa associated with disease using sputum samples. Patients were taken as random effect in this model. Relative abundance was transformed using arcsin square-root transformation first before running this model. Results were filtered based on both significance (FDR-adjusted  $p < 0.05$ ) and effect size (absolute coefficient  $\geq 0.1$ ). *Streptococcus* and

*Veillonella* were found most significantly associated with disease (top panel) and they are enriched in patient and healthy groups respectively (bottom panel). (G) PCoA analysis based on Bray-Curtis distance of stool samples, including Healthy controls (n=8), mild (n=15), moderate (n=10 patient samples and non-template controls (NTC, n=2). There is no difference between patient samples and healthy controls ( $p=0.08$ ). (H) Comparison of alpha diversity between Healthy controls (n=8) and Patient stools samples (n=25). Wilcoxon rank-sum test was applied. No difference of alpha diversity between healthy controls and patient samples was observed, in terms of both species richness (left panel) and Shannon index (right panel). (I) Comparison of abundance of taxa (shown as read count, in log<sub>10</sub>-scale) identified in (F) between patient samples and NTC controls. Kruskal-Wallis test was applied here.

**Figure S4, related to Figure 4. Abundance of identified potential pathogens profiled by metagenomics assembly workflow.** The abundance was calculated as the coverage of contigs assigned to certain species, and then normalized by sequencing depth.

**Figure S5, related to Figure 5. SARS-CoV-2 genome sequencing results of MINERVA-m and MINERVA-e libraries.** (A) SARS-CoV-2 mapping ratio statistics of MINERVA-e libraries. (B and C) SARS-CoV-2 genome coverage and depth statistics of MINERVA-m libraries. (D and E) SARS-CoV-2 genome depth statistics of MINERVA-e libraries of 3T3 (D) and healthy donor (E) samples.

**Figure S6, related to Figure 6. Longitudinal SARS-CoV-2 mutation analysis of individual patients.**

**Figure S7, related Figure 7. Evaluation of microbial profiles by merged MINERVA (MINERVA-m+e) datasets.** (A and B) Correlation of alpha diversity, including species richness (A) and Shannon index (B), between dsDL and merged (m+e) datasets. (C) Comparison of bacterial composition of stool and sputum samples between dsDL and MINERVA-m+e datasets. Genus with relative abundance over 1% are shown here.

Figure S1

A

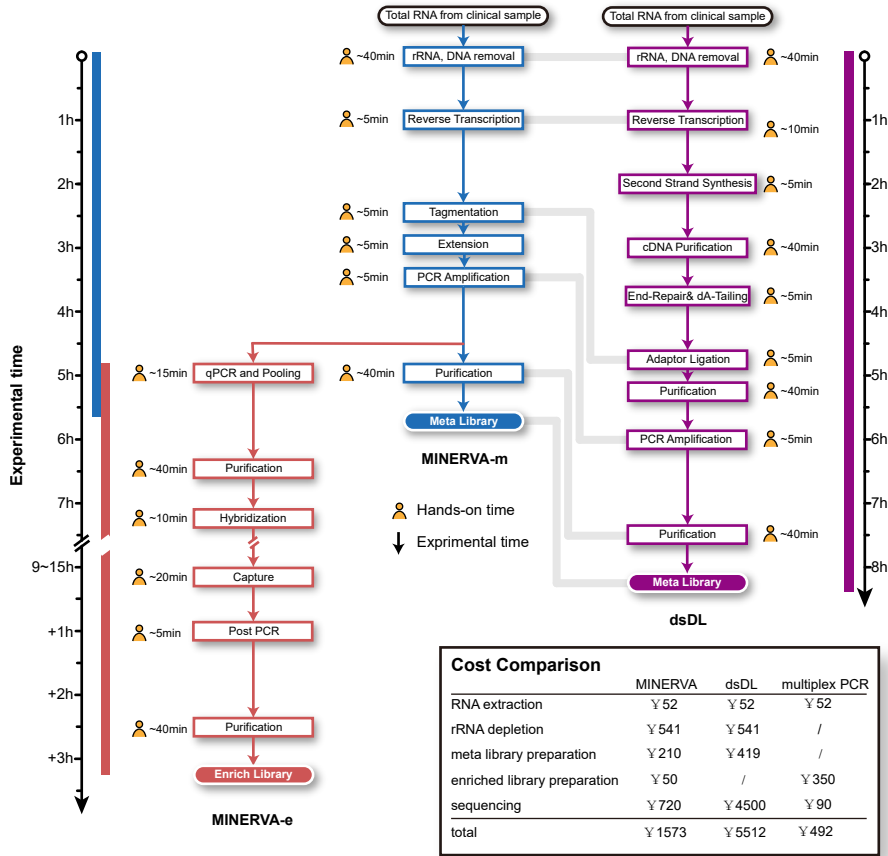

B

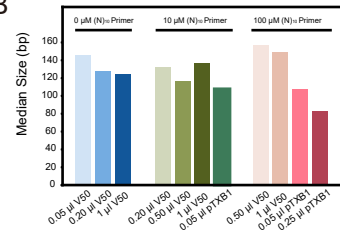

C

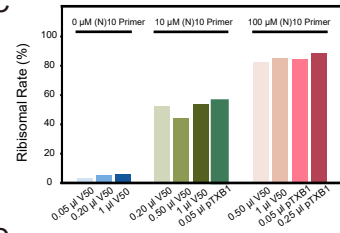

D

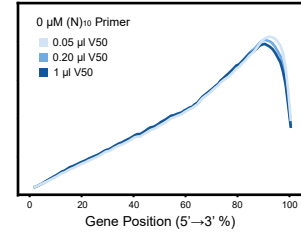

E

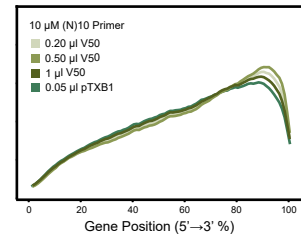

Figure S2

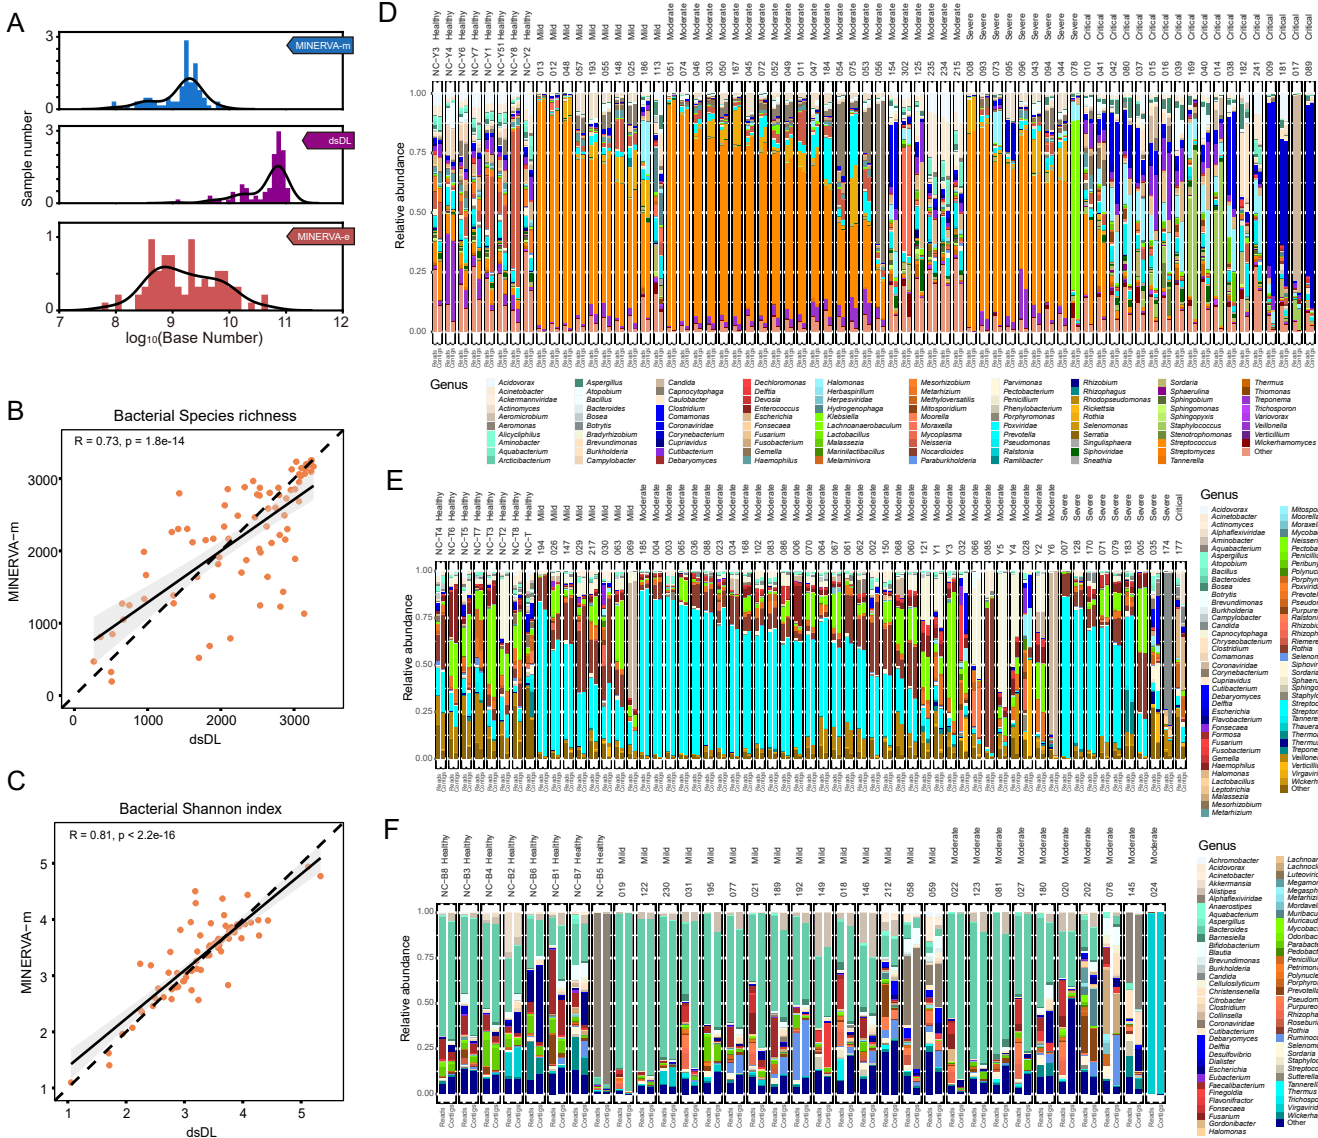

Figure S3

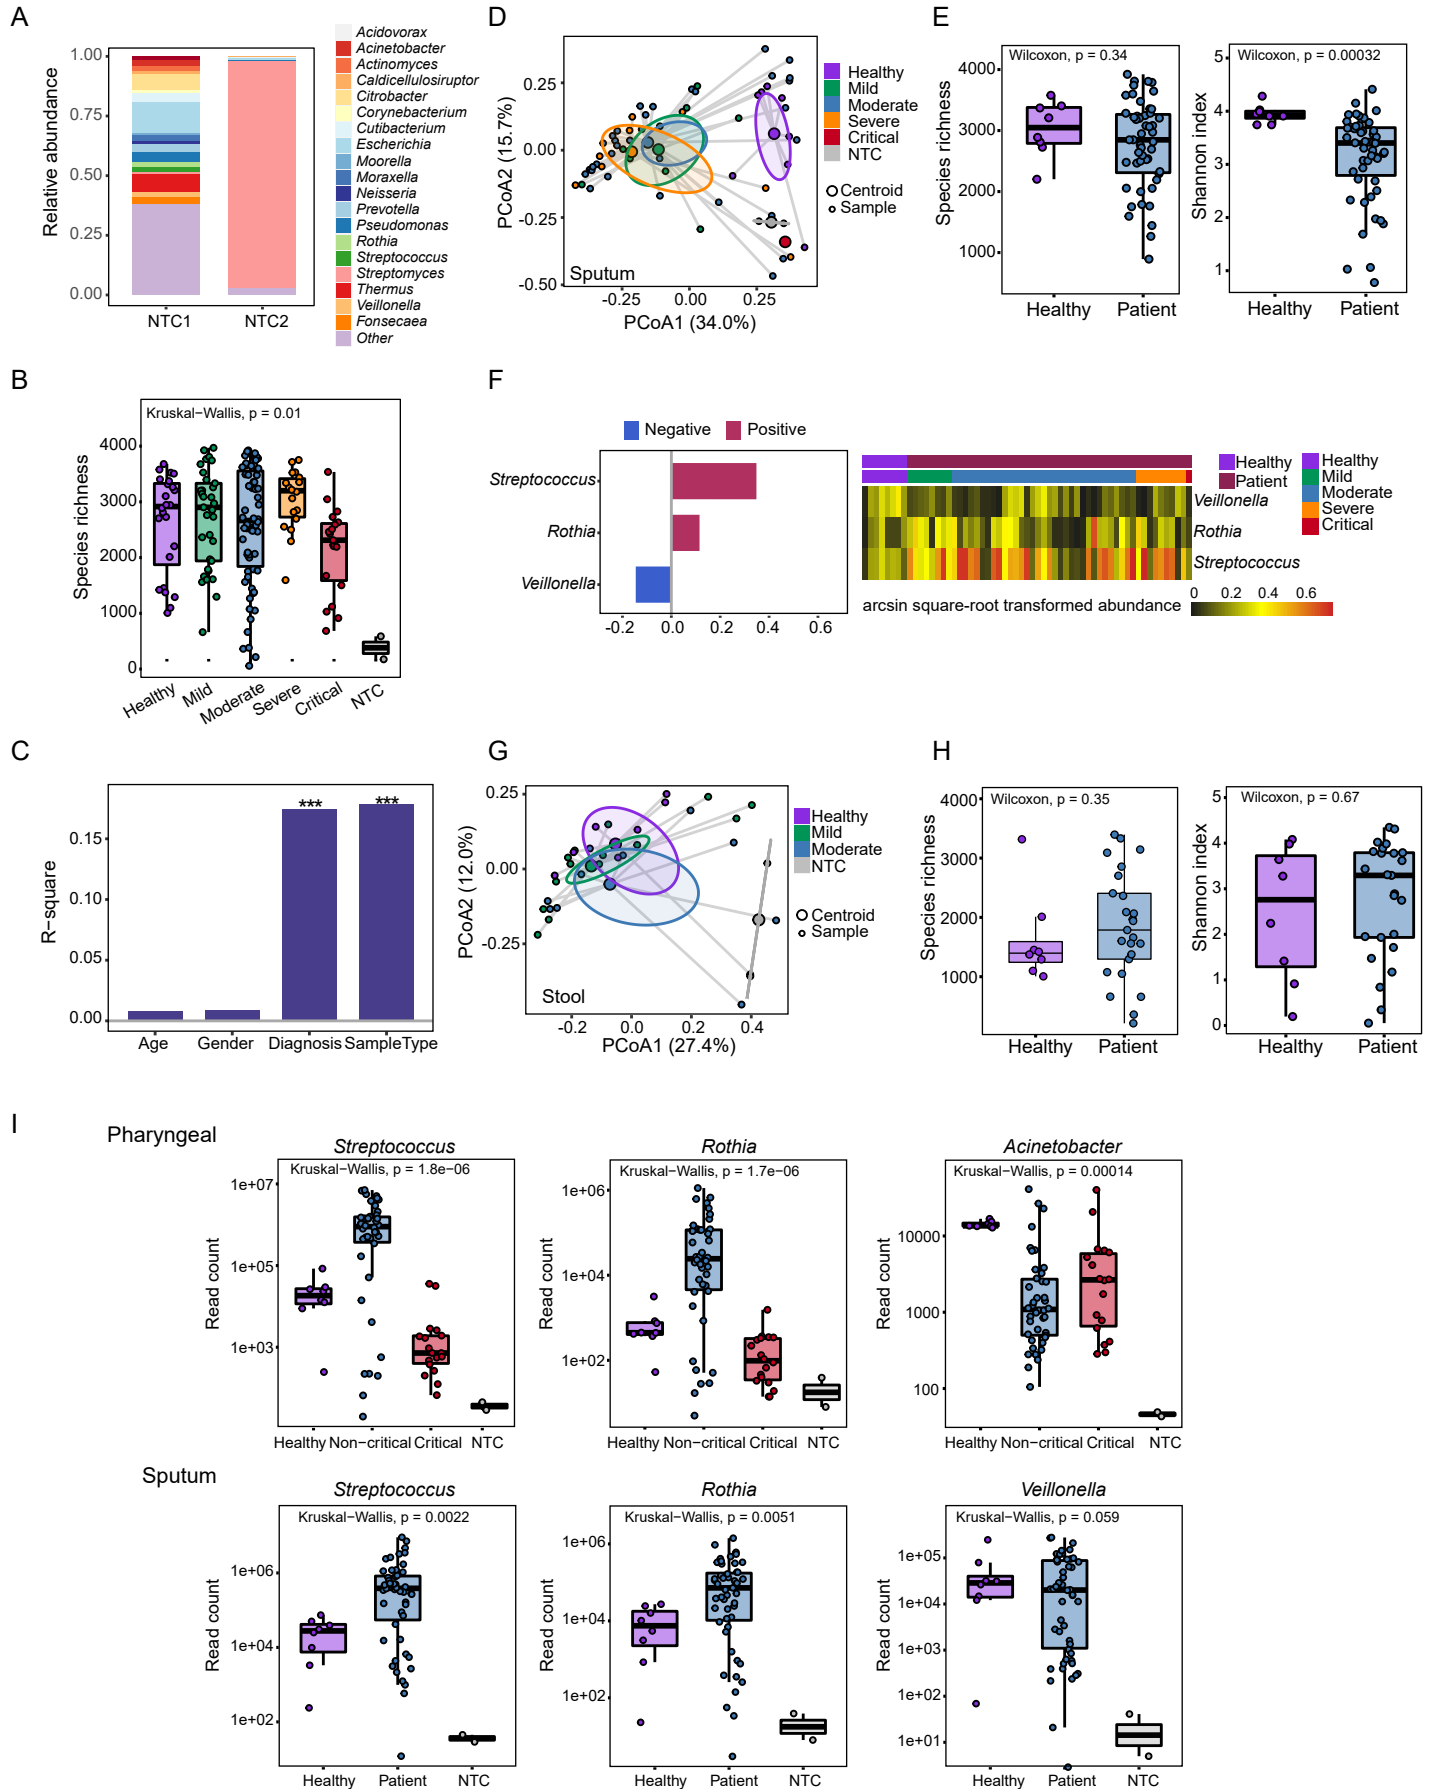





Figure S5

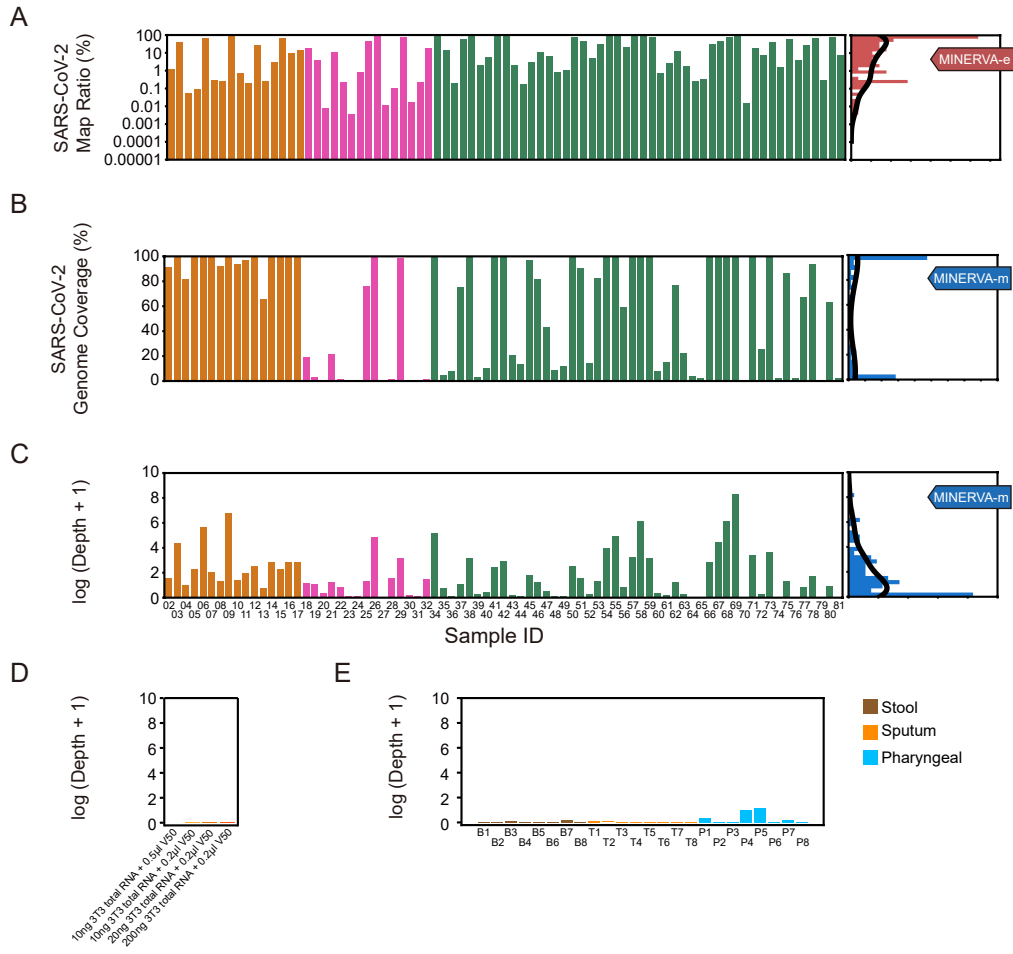

Figure S6

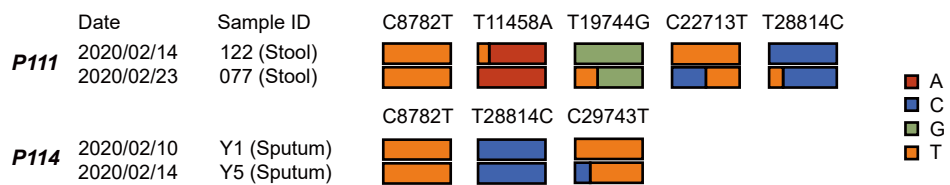

Figure S7

A

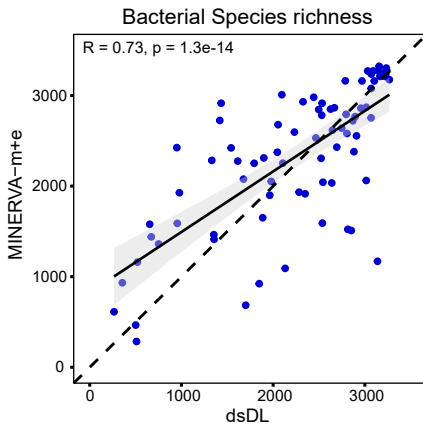

B

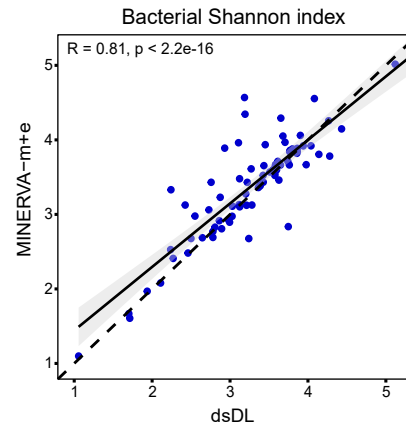

C

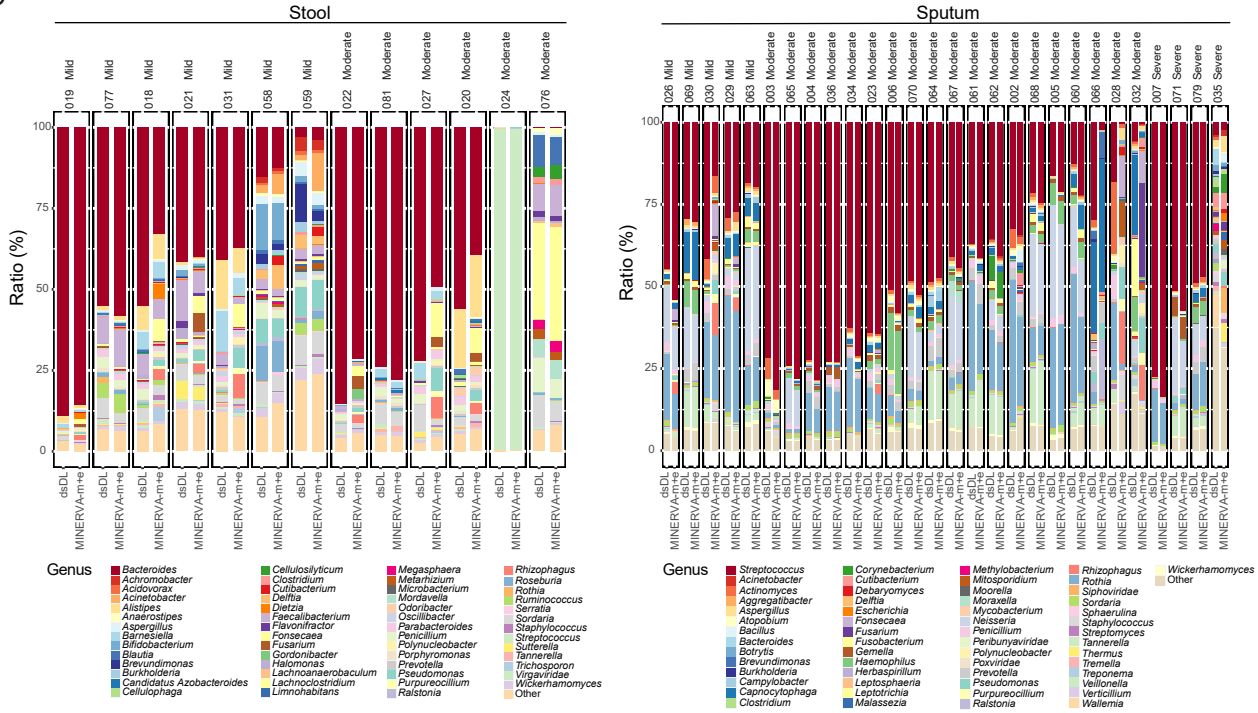

Table S1, related to Figure2

QC of All Sequencing Libraries

| Sample ID | MINERVA-e  |             |               |                |             |     | MINERVA-m   |             |               |                |             |      | dsDL       |               |                |             |  |  |
|-----------|------------|-------------|---------------|----------------|-------------|-----|-------------|-------------|---------------|----------------|-------------|------|------------|---------------|----------------|-------------|--|--|
|           | Input (μl) | Total Reads | Mapping Ratio | Dedup Coverage | Dedup Depth |     | Input (μl)  | Total Reads | Mapping Ratio | Dedup Coverage | Dedup Depth |      | Input (μl) | Mapping Ratio | Dedup Coverage | Dedup Depth |  |  |
| 002       | 10.8       | 8,195,484   | 1.1638%       | 65.03%         | 4.9783      |     | 10.8        | 5,094,918   | 0.1307%       | 90.87%         | 4.0136      |      | 10.0       | 0.0004%       | 68.96%         | 1.4060      |  |  |
| 003       | 10.8       | 207,709,272 | 40.9510%      | 100.00%        | 946.9857    |     | 10.8        | 78,496,044  | 0.0640%       | 99.98%         | 77.9333     |      | 10.0       | 0.0196%       | 99.97%         | 323.3180    |  |  |
| 004       | 10.8       | 20,676,516  | 0.0524%       | 98.40%         | 5.2755      |     | 10.8        | 10,065,834  | 0.0126%       | 81.80%         | 1.7732      |      | 10.0       | 0.0001%       | 76.27%         | 1.7278      |  |  |
| 005       | 10.8       | 11,115,446  | 0.0262%       | 100.00%        | 61.0830     |     | 10.8        | 63,641,086  | 0.0092%       | 99.85%         | 8.8701      |      | 10.0       | 0.0001%       | 56.29%         | 0.9247      |  |  |
| 006       | 10.8       | 46,396,564  | 70.7456%      | 100.00%        | 3143.9166   |     | 10.8        | 78,571,522  | 0.2261%       | 100.00%        | 295.0117    |      | 10.0       | 0.0945%       | 99.97%         | 1469.0300   |  |  |
| 007       | 10.8       | 9,942,786   | 0.2815%       | 99.64%         | 10.7657     |     | 10.8        | 52,865,726  | 0.0101%       | 98.97%         | 6.5938      |      | 10.0       | 0.0002%       | 94.25%         | 3.8018      |  |  |
| 008       | 10.8       | 10,763,536  | 0.2497%       | 99.54%         | 8.5537      |     | 10.8        | 47,103,600  | 0.0067%       | 91.82%         | 2.7499      |      | 10.0       | 0.0008%       | 66.42%         | 2.2585      |  |  |
| 009       | 10.8       | 541,628,130 | 96.7444%      | 100.00%        | 3350.7269   |     | 10.8        | 21,166,816  | 5.9250%       | 100.00%        | 884.5224    |      | 10.0       | 4.7686%       | 99.95%         | 57.2028     |  |  |
| 010       | 10.8       | 5,668,752   | 0.7054%       | 54.96%         | 2.7434      |     | 10.8        | 4,089,390   | 0.1068%       | 93.61%         | 3.2721      |      | 10.0       | 0.0002%       | 62.59%         | 1.2704      |  |  |
| 011       | 10.8       | 11,176,696  | 0.2093%       | 99.99%         | 11.2174     |     | 10.8        | 41,913,790  | 0.0200%       | 96.90%         | 6.1212      |      | 10.0       | 0.0001%       | 87.87%         | 2.5211      |  |  |
| 012       | 10.8       | 16,151,064  | 27.1568%      | 99.84%         | 34.2213     |     | 10.8        | 40,226,610  | 0.0427%       | 99.72%         | 11.6552     |      | 10.0       | 0.0003%       | 99.86%         | 11.9888     |  |  |
| 013       | 10.8       | 14,881,342  | 0.2670%       | 96.25%         | 4.8453      |     | 10.8        | 7,335,290   | 0.0130%       | 65.48%         | 1.1660      |      | 10.0       | 0.0006%       | 99.96%         | 12.2455     |  |  |
| 014       | 10.8       | 13,884,580  | 3.0261%       | 99.99%         | 19.2685     |     | 10.8        | 21,795,080  | 0.1882%       | 99.55%         | 16.0357     |      | 10.0       | 0.0010%       | 62.14%         | 1.1220      |  |  |
| 015       | 10.8       | 12,387,588  | 65.9296%      | 99.90%         | 33.5811     |     | 10.8        | 3,105,472   | 0.3064%       | 99.49%         | 8.9043      |      | 10.0       | 0.0704%       | 99.87%         | 13.4546     |  |  |
| 016       | 10.8       | 13,025,918  | 9.2768%       | 99.84%         | 21.6711     |     | 10.8        | 19,495,766  | 0.3039%       | 99.55%         | 15.9261     |      | 10.0       | 0.0037%       | 84.08%         | 2.2149      |  |  |
| 017       | 10.8       | 16,384,556  | 13.2056%      | 99.86%         | 26.7111     |     | 10.8        | 32,164,850  | 0.1227%       | 99.88%         | 16.2674     |      | 10.0       | 0.0058%       | 31.20%         | 0.8448      |  |  |
| 018       | 2.7        | 112,794,866 | 19.1814%      | 77.76%         | 6.9234      | 2.7 | 35,616,834  | 0.0253%     | 18.55%        | 2.3147         | 2.7         | 10.0 | 0.0001%    | 78.13%        | 2.0642         |             |  |  |
| 019       | 2.7        | 93,872,216  | 4.1077%       | 64.13%         | 4.6651      | 2.7 | 35,775,154  | 0.0244%     | 2.94%         | 1.9927         | 2.7         | 10.0 | 0.0000%    | 53.13%        | 0.9280         |             |  |  |
| 020       | 2.7        | 82,493,546  | 0.0076%       | 54.44%         | 2.2178      | 2.7 | 36,822,898  | 0.0030%     | 0.12%         | 0.4650         | 2.7         | 10.0 | 0.0000%    | 13.77%        | 0.1814         |             |  |  |
| 021       | 2.7        | 92,874,254  | 11.0905%      | 75.64%         | 6.0904      | 2.7 | 22,813,548  | 0.0549%     | 21.45%        | 2.4093         | 2.7         | 10.0 | 0.0001%    | 61.54%        | 1.2370         |             |  |  |
| 022       | 2.7        | 106,391,154 | 0.2108%       | 68.52%         | 3.4031      | 2.7 | 37,797,862  | 0.0108%     | 1.27%         | 1.3720         | 2.7         | 10.0 | 0.0000%    | 23.47%        | 0.3527         |             |  |  |
| 023       | 2.7        | 135,954,444 | 0.0034%       | 67.87%         | 1.9198      | 2.7 | 36,422,158  | 0.0013%     | 0.13%         | 0.1155         | 2.7         | 10.0 | 0.0004%    | 0.76%         | 0.0201         |             |  |  |
| 024       | 2.7        | 68,556,412  | 0.7855%       | 58.16%         | 2.1196      | 2.7 | 32,646,446  | 0.0018%     | 0.12%         | 0.1614         | 2.7         | 10.0 | 0.0000%    | 22.52%        | 0.3292         |             |  |  |
| 025       | 2.7        | 201,614,222 | 47.7643%      | 99.00%         | 15,9794     | 2.7 | 34,287,778  | 0.0092%     | 75.47%        | 2.9378         | 2.7         | 10.0 | 0.0013%    | 99.96%        | 29.3693        |             |  |  |
| 026       | 2.7        | 642,140,604 | 32.8531%      | 100.00%        | 1621.8374   | 2.7 | 41,504,770  | 0.1649%     | 99.89%        | 124.7145       | 2.7         | 10.0 | 0.0043%    | 99.99%        | 1111.6309      |             |  |  |
| 027       | 2.7        | 28,519,004  | 0.0112%       | 92.50%         | 4.5196      | 2.7 | 34,802,762  | 0.0001%     | 0.11%         | 0.0351         | 2.7         | 10.0 | 0.0000%    | 10.32%        | 0.1326         |             |  |  |
| 028       | 2.7        | 9,792,364   | 0.1043%       | 76.38%         | 4.0190      | 2.7 | 22,201,210  | 0.0817%     | 1.61%         | 3.6903         | 2.7         | 10.0 | 0.0002%    | 39.17%        | 0.9250         |             |  |  |
| 029       | 2.7        | 175,344,692 | 75.5914%      | 100.00%        | 327.4946    | 2.7 | 33,195,792  | 0.0341%     | 98.64%        | 22.5668        | 2.7         | 10.0 | 0.0184%    | 99.98%        | 235.8581       |             |  |  |
| 030       | 2.7        | 25,325,652  | 0.0177%       | 94.24%         | 5.2230      | 2.7 | 36,375,652  | 0.0034%     | 0.19%         | 0.2462         | 2.7         | 10.0 | 0.0000%    | 21.75%        | 0.4325         |             |  |  |
| 031       | 2.7        | 51,558,410  | 0.2134%       | 98.55%         | 10.2587     | 2.7 | 48,321,376  | 0.0011%     | 0.47%         | 0.0996         | 2.7         | 10.0 | 0.0001%    | 12.83%        | 0.3015         |             |  |  |
| 032       | 2.7        | 1,638,196   | 17.5565%      | 82.31%         | 3.1014      | 2.7 | 2,855,228   | 0.2650%     | 0.89%         | 3.5194         | 2.7         | 10.0 | 0.0508%    | 49.21%        | 7.7024         |             |  |  |
| 034       | 5.4        | 146,373,482 | 90.6535%      | 100.00%        | 7359.4100   | 5.4 | 10,605,224  | 0.7548%     | 100.00%       | 176.2427       | 5.4         | 10.0 | 0.1662%    | 99.98%        | 842.7465       |             |  |  |
| 035       | 5.4        | 749,392     | 13.5239%      | 33.49%         | 1.1914      | 5.4 | 4,854,666   | 0.0509%     | 4.67%         | 1.2298         | 5.4         | 10.0 | 0.0041%    | 32.24%        | 0.5876         |             |  |  |
| 036       | 5.4        | 66,509,586  | 0.1866%       | 99.96%         | 23.8832     | 5.4 | 111,047,572 | 0.0001%     | 7.79%         | 0.1038         | 5.4         | 10.0 | 0.0003%    | 57.51%        | 1.0422         |             |  |  |
| 037       | 5.4        | 9,834,452   | 60.1041%      | 98.86%         | 10.6667     | 5.4 | 4,406,210   | 0.0336%     | 74.81%        | 2.0089         | 5.4         | 10.0 | 0.0201%    | 56.10%        | 1.2234         |             |  |  |
| 038       | 5.4        | 43,022,752  | 97.0263%      | 100.00%        | 252.6044    | 5.4 | 1,123,198   | 0.9702%     | 99.99%        | 23.4852        | 5.4         | 10.0 | 0.5773%    | 99.85%        | 17.2460        |             |  |  |
| 039       | 5.4        | 1,340,114   | 2.0089%       | 4.79%          | 0.4514      | 5.4 | 3,976,390   | 0.0153%     | 2.83%         | 0.3394         | 5.4         | 10.0 | 0.0009%    | 24.99%        | 0.4494         |             |  |  |
| 040       | 5.4        | 3,628,686   | 5.6932%       | 24.91%         | 0.8514      | 5.4 | 4,912,264   | 0.0177%     | 9.88%         | 0.5260         | 5.4         | 10.0 | 0.0008%    | 19.53%        | 0.3346         |             |  |  |
| 041       | 5.4        | 29,918,078  | 83.4096%      | 99.86%         | 48.3122     | 5.4 | 5,950,044   | 0.1372%     | 98.88%        | 10.4956        | 5.4         | 10.0 | 0.1244%    | 99.91%        | 25.1505        |             |  |  |
| 042       | 5.4        | 63,305,808  | 92.6539%      | 99.99%         | 242.1007    | 5.4 | 2,034,818   | 0.4434%     | 99.61%        | 17.8696        | 5.4         | 10.0 | 0.1145%    | 99.97%        | 75.3447        |             |  |  |
| 043       | 5.4        | 28,502,096  | 2.0792%       | 98.90%         | 8.6775      | 5.4 | 21,291,192  | 0.0006%     | 20.84%        | 0.2769         | 5.4         | 10.0 | 0.0008%    | 43.21%        | 0.8251         |             |  |  |
| 044       | 5.4        | 23,678,350  | 0.1632%       | 73.65%         | 2.0966      | 5.4 | 15,802,562  | 0.0008%     | 13.19%        | 0.1653         | 5.4         | 10.0 | 0.0004%    | 31.84%        | 0.5936         |             |  |  |
| 045       | 5.4        | 29,763,804  | 3.0793%       | 99.93%         | 15.9794     | 5.4 | 19,682,236  | 0.0198%     | 96.32%        | 4.9701         | 5.4         | 10.0 | 0.0012%    | 97.70%        | 5.9600         |             |  |  |
| 046       | 5.4        | 48,503,988  | 100.00%       | 100.00%        | 158.1937    | 5.4 | 24,375,006  | 0.0034%     | 81.61%        | 2.4673         | 5.4         | 10.0 | 0.0043%    | 99.96%        | 4.5512         |             |  |  |
| 047       | 5.4        | 32,374,174  | 6.1377%       | 99.89%         | 17.6006     | 5.4 | 20,075,024  | 0.0017%     | 42.98%        | 0.7470         | 5.4         | 10.0 | 0.0014%    | 84.73%        | 2.6273         |             |  |  |
| 048       | 5.4        | 33,545,522  | 0.8612%       | 95.79%         | 6.1428      | 5.4 | 24,579,728  | 0.0003%     | 8.20%         | 0.1238         | 5.4         | 10.0 | 0.0008%    | 54.43%        | 1.1477         |             |  |  |
| 049       | 5.4        | 41,228,324  | 1.0147%       | 99.88%         | 18.1782     | 5.4 | 29,981,390  | 0.0003%     | 11.99%        | 0.1741         | 5.4         | 10.0 | 0.0005%    | 91.95%        | 3.3415         |             |  |  |
| 050       | 5.4        | 12,177,692  | 71.4756%      | 99.90%         | 121.7697    | 5.4 | 22,754,546  | 0.0264%     | 99.44%        | 11.6945        | 5.4         | 10.0 | 0.0421%    | 99.96%        | 51.3386        |             |  |  |
| 051       | 5.4        | 6,105,636   | 46.9134%      | 99.78%         | 28.5245     | 5.4 | 21,784,580  | 0.0109%     | 90.56%        | 3.7560         | 5.4         | 10.0 | 0.0058%    | 99.95%        | 25.2443        |             |  |  |
| 052       | 5.4        | 3,830,746   | 4.8117%       | 90.86%         | 4.5674      | 5.4 | 24,464,202  | 0.0008%     | 14.20%        | 0.2901         | 5.4         | 10.0 | 0.0005%    | 89.55%        | 2.9335         |             |  |  |
| 053       | 5.4        | 6,556,106   | 32.5097%      | 100.00%        | 72.9775     | 5.4 | 25,666,594  | 0.0055%     | 82.54%        | 2.7256         | 5.4         | 10.0 | 0.0033%    | 99.96%        | 47.4457        |             |  |  |
| 054       | 5.4        | 45,398,712  | 88.7216%      | 100.00%        | 1074.7572   | 5.4 | 28,016,362  | 0.0849%     | 100.00%       | 52.9310        | 5.4         | 10.0 | 0.0896%    | 100.00%       | 843.4279       |             |  |  |
| 055       | 5.4        | 103,807,862 | 94.1763%      | 100.00%        | 3139.9488   | 5.4 | 25,661,784  | 0.2476%     | 100.00%       | 139.5156       | 5.4         | 10.0 | 0.1555%    | 99.99%        | 1233.6985      |             |  |  |
| 056       | 5.4        | 5,072,904   | 21.2207%      | 99.86%         | 38.2663     | 5.4 | 25,257,896  | 0.0029%     | 59.39%        | 1.3265         | 5.4         | 10.0 | 0.0020%    | 99.96%        | 37.2734        |             |  |  |
| 057       | 5.4        | 26,651,568  | 81.5262%      | 100.00%        | 764.1384    | 5.4 | 23,771,526  | 0.0475%     | 99.90%        | 25.3226        | 5.4         | 10.0 | 0.0392%    | 100.00%       | 773.4338       |             |  |  |
| 058       | 5.4        | 119,250,340 | 89.4189%      | 100.00%        | 1499.0878   | 5.4 | 21,737,544  | 1.3970%     | 99.99%        | 481.7897       | 5.4         | 10.0 | 0.8035%    | 99.96%        | 18.0897        |             |  |  |
| 059       | 5.4        | 13,876,992  | 73.0525%      | 99.98%         | 94.7249     | 5.4 | 6,897,404   | 0.2907%     | 99.98%        | 23.3441        | 5.4         | 10.0 | 0.0756%    | 60.08%        | 1.0516         |             |  |  |
| 060       | 5.4        | 5,064,692   | 0.7576%       | 81.74%         | 2.8944      | 5.4 | 28,676,654  | 0.0022%     | 7.97%         | 0.4627         | 5.4         | 10.0 | 0.0004%    | 46.13%        | 0.9281         |             |  |  |
| 061       | 5.4        | 3,237,272   | 2.4584%       | 94.59%         | 4.1871      | 5.4 | 12,599,798  | 0.0007%     | 14.80%        | 0.1898         | 5.4         | 10.0 | 0.0003%    | 38.29%        | 0.6626         |             |  |  |
| 062       | 5.4        | 6,685,592   | 12.8404%      | 99.99%         | 46.9370     | 5.4 | 18,066,044  | 0.0082%     | 76.60%        | 2.4364         | 5.4         | 10.0 | 0.0048%    | 99.89%        | 11.2049        |             |  |  |
| 063       | 5.4        | 6,482,172   | 1.7973%       | 96.84%         | 5.4459      | 5.4 | 23,768,308  | 0.0006%     | 21.74%        | 0.2900         | 5.4         | 10.0 | 0.0005%    | 77.05%        | 2.1138         |             |  |  |
| 064       | 5.4        | 9,466,060   | 0.2669%       | 96.99%         | 4.5785      | 5.4 | 22,213,506  | 0.0001%     | 3.55%         | 0.0437         | 5.4         | 10.0 | 0.0001%    | 49.20%        | 0.8110         |             |  |  |
| 065       | 5.4        | 47,983,266  | 13.3823%      | 76.84%         | 1.98437     | 5.4 | 24,375,006  | 0.0001%     | 0.0001%       | 0.0206         | 5.4         | 10.0 | 0.0000%    | 47.11%        | 0.6932         |             |  |  |
| 066       | 5.4        | 5,970,510   | 29.3245%      | 99.91%         | 30.3217     | 5.4 | 22,078,330  | 0.0951%     | 99.92%        | 16.9899        | 5.4         | 10.0 | 0.0290%    | 92.86%        | 4.1057         |             |  |  |
| 067       | 5.4        | 8,697,652   | 47.3466%      | 100.00%        | 768.4558    | 5.4 | 23,501,026  | 0.1764%     | 100.00%       | 88.7774        | 5.4         | 10.0 | 0.1034%    | 99.97%        | 490.0341       |             |  |  |
| 068       | 5.4        | 25,258,898  | 76.1765%      | 100.00%        | 4894.2700   | 5.4 | 28,494,342  | 0.8557%     | 100.00%       | 475.1583       | 5.4         | 10.0 | 0.5174%    | 99.96%        | 177.1438       |             |  |  |
| 069       | 5.4        | 141,070,280 | 96.2193%      | 100.00%        | 7846.8553   | 5.4 | 28,135,628  | 13.5652%    | 100.00%       | 4153.0717      | 5.4         | 10.0 | 8.8958%    | 100.00%       | 6361.1653      |             |  |  |
| 070       | 5.4        | 5,686,808   | 0.0154%       | 77.96%         | 1.8157      | 5.4 | 24,052,452  | 0.0000%     | 0.54%         | 0.0102         | 5.4         | 10.0 | 0.0010%    | 99.68%        | 9.4708         |             |  |  |
| 071       | 5.4        | 9,016,134   | 18.4892%      | 100.00%        | 506.1078    | 5.4 | 30,946,146  | 0.0458%     | 99.95%        | 30.1117        | 5.4         | 10.0 | 0.0199%    | 99.96%        | 26.0630</      |             |  |  |

|     |     |             |          |        |          |     |             |         |        |        |   |   |   |   |
|-----|-----|-------------|----------|--------|----------|-----|-------------|---------|--------|--------|---|---|---|---|
| 194 | 5.4 | 113,929,174 | 3.5935%  | 94.84% | 6.6863   | 5.4 | 74,882,784  | 0.0003% | 10.12% | 0.2392 | / | / | / | / |
| 195 | 5.4 | 231,325,932 | 56.4214% | 99.93% | 128.3160 | 5.4 | 79,420,208  | 0.0013% | 73.32% | 2.4829 | / | / | / | / |
| 202 | 5.4 | 95,943,060  | 1.7786%  | 99.32% | 17.7605  | 5.4 | 89,627,594  | 0.0003% | 5.01%  | 0.1965 | / | / | / | / |
| 212 | 5.4 | 46,499,962  | 3.9862%  | 23.11% | 8.1436   | 5.4 | 38,353,226  | 0.0004% | 5.08%  | 0.1772 | / | / | / | / |
| 215 | 5.4 | 2,730,220   | 5.1572%  | 10.83% | 8.0875   | 5.4 | 6,576,196   | 0.0157% | 1.33%  | 0.7010 | / | / | / | / |
| 217 | 5.4 | 161,866,574 | 0.1522%  | 36.96% | 8.0366   | 5.4 | 100,830,192 | 0.0001% | 0.24%  | 0.0928 | / | / | / | / |
| 230 | 5.4 | 185,858,560 | 49.0328% | 99.85% | 166.8540 | 5.4 | 129,451,404 | 0.0022% | 94.36% | 6.8372 | / | / | / | / |
| 234 | 5.4 | 715,080     | 5.5852%  | 27.33% | 0.4704   | 5.4 | 2,587,668   | 0.0027% | 0.39%  | 0.0659 | / | / | / | / |
| 235 | 5.4 | 645,750     | 89.4572% | 42.31% | 0.7548   | 5.4 | 785,898     | 0.0015% | 0.93%  | 0.0190 | / | / | / | / |
| 241 | 5.4 | 9,439,472   | 86.2488% | 78.08% | 12.7547  | 5.4 | 7,703,008   | 0.0373% | 48.17% | 2.7466 | / | / | / | / |
| 302 | 5.4 | 24,776,174  | 0.2073%  | 26.62% | 0.8079   | 5.4 | 54,812,846  | 0.0009% | 0.50%  | 0.2893 | / | / | / | / |
| 303 | 5.4 | 144,586,436 | 0.0590%  | 76.90% | 2.5174   | 5.4 | 144,176,290 | 0.0002% | 0.12%  | 0.1328 | / | / | / | / |

**Protocol Optimization**

|    |     |             |          |         |           |     |            |          |         |          |  |  |  |  |
|----|-----|-------------|----------|---------|-----------|-----|------------|----------|---------|----------|--|--|--|--|
| 02 |     |             |          |         |           | 2.7 | 16,408,870 | 0.1012%  | 88.32%  | 4.8521   |  |  |  |  |
| 03 |     |             |          |         |           | 2.7 | 47,083,344 | 0.0520%  | 99.96%  | 40.6153  |  |  |  |  |
| 04 |     |             |          |         |           | 2.7 | 57,543,194 | 0.0027%  | 44.43%  | 0.7633   |  |  |  |  |
| 05 |     |             |          |         |           | 2.7 | 59,021,696 | 0.0019%  | 41.02%  | 0.6959   |  |  |  |  |
| 06 |     |             |          |         |           | 2.7 | 43,005,642 | 0.1520%  | 100.00% | 114.7798 |  |  |  |  |
| 07 | 2.7 | 6,807,324   | 0.2123%  | 92.42%  | 3.2703    | 2.7 | 59,245,398 | 0.0048%  | 93.44%  | 4.4251   |  |  |  |  |
| 08 | 2.7 | 7,133,858   | 0.2009%  | 95.80%  | 4.2571    | 2.7 | 53,691,494 | 0.0057%  | 91.36%  | 4.0402   |  |  |  |  |
| 09 | 2.7 | 534,740,522 | 97.9777% | 100.00% | 2185.2300 | 2.7 | 17,555,514 | 6.0440%  | 100.00% | 378.9593 |  |  |  |  |
| 10 |     |             |          |         |           | 2.7 | 17,409,862 | 0.1325%  | 84.16%  | 5.2398   |  |  |  |  |
| 11 | 2.7 | 58          | 0.0000%  | 0.00%   | 0.0000    | 2.7 | 1,618      | 0.0618%  | 0.10%   | 0.0010   |  |  |  |  |
| 12 | 2.7 | 17,074,722  | 30.2408% | 99.61%  | 15.5067   | 2.7 | 47,310,582 | 0.0206%  | 98.08%  | 9.1497   |  |  |  |  |
| 13 |     |             |          |         |           | 2.7 | 48,064,580 | 0.0035%  | 41.59%  | 0.7463   |  |  |  |  |
| 14 | 2.7 | 12,514,502  | 4.9961%  | 98.33%  | 7.4607    | 2.7 | 28,491,880 | 0.1188%  | 99.49%  | 18.5844  |  |  |  |  |
| 15 |     |             |          |         |           | 2.7 | 18,079,484 | 0.2210%  | 98.69%  | 10.7718  |  |  |  |  |
| 16 | 2.7 | 8,061,366   | 18.2108% | 94.00%  | 4.9191    | 2.7 | 15,778,084 | 0.1176%  | 98.85%  | 12.2731  |  |  |  |  |
| 17 | 2.7 | 17,317,738  | 12.2331% | 99.49%  | 11.8779   | 2.7 | 45,806,156 | 0.0700%  | 99.44%  | 17.8944  |  |  |  |  |
| 50 | 2.7 | 5,302,774   | 71.9360% | 98.74%  | 56.2274   | 2.7 | 9,440,676  | 0.0260%  | 94.59%  | 4.86135  |  |  |  |  |
|    |     | 6,874,918   | 71.0528% | 99.90%  | 68.0711   |     | 13,313,870 | 0.0267%  | 97.44%  | 6.94325  |  |  |  |  |
|    |     | 2,651,528   | 45.9457% | 99.27%  | 12.73     |     | 9,956,018  | 0.0106%  | 66.31%  | 1.68468  |  |  |  |  |
| 51 | 2.7 | 3,454,108   | 47.6123% | 99.75%  | 16.0504   | 2.7 | 11,828,562 | 0.0112%  | 75.74%  | 2.11945  |  |  |  |  |
|    |     | 1,812,456   | 5.1702%  | 78.61%  | 2.70916   |     | 11,905,088 | 0.0011%  | 7.45%   | 0.166271 |  |  |  |  |
| 52 | 2.7 | 2,018,290   | 4.4788%  | 68.52%  | 1.99716   | 2.7 | 12,559,114 | 0.0006%  | 8.10%   | 0.129552 |  |  |  |  |
|    |     | 2,661,912   | 32.8762% | 99.97%  | 33.6088   |     | 11,393,230 | 0.0058%  | 56.44%  | 1.28014  |  |  |  |  |
| 53 | 2.7 | 3,894,194   | 32.2177% | 99.91%  | 40.2593   | 2.7 | 14,273,364 | 0.0054%  | 64.91%  | 1.47253  |  |  |  |  |
|    |     | 16,862,842  | 88.9164% | 100.00% | 554.182   |     | 10,453,800 | 0.0886%  | 99.98%  | 21.1365  |  |  |  |  |
| 54 | 2.7 | 28,535,870  | 88.4747% | 99.98%  | 623.171   | 2.7 | 17,562,562 | 0.0827%  | 100.00% | 32.3643  |  |  |  |  |
|    |     | 50,308,172  | 94.4399% | 100.00% | 1763.58   |     | 12,242,678 | 0.2470%  | 99.97%  | 68.163   |  |  |  |  |
| 55 | 2.7 | 53,499,690  | 93.7940% | 100.00% | 1910.21   | 2.7 | 13,419,106 | 0.2482%  | 100.00% | 75.0258  |  |  |  |  |
|    |     | 2,407,594   | 21.5466% | 99.75%  | 18.4627   |     | 11,510,576 | 0.0029%  | 34.62%  | 0.621309 |  |  |  |  |
| 56 | 2.7 | 2,665,310   | 20.8997% | 99.82%  | 20.063    | 2.7 | 13,747,320 | 0.0029%  | 39.51%  | 0.716082 |  |  |  |  |
|    |     | 12,058,338  | 80.8714% | 100.00% | 375.207   |     | 10,977,398 | 0.0477%  | 99.15%  | 11.8002  |  |  |  |  |
| 57 | 2.7 | 14,593,230  | 81.9503% | 100.00% | 438.47    | 2.7 | 12,794,128 | 0.0474%  | 99.35%  | 13.7123  |  |  |  |  |
| 42 | 5.4 | 63,305,808  | 92.6539% | 99.99%  | 242.1007  | 5.4 | 2,034,818  | 0.4434%  | 99.61%  | 17.8696  |  |  |  |  |
| 43 | 5.4 | 28,502,096  | 2.0792%  | 98.90%  | 8.6775    | 5.4 | 21,291,192 | 0.0006%  | 20.84%  | 0.2769   |  |  |  |  |
| 44 | 5.4 | 23,678,350  | 0.1632%  | 2.0966  | 73.65%    | 5.4 | 15,802,662 | 0.0008%  | 13.19%  | 0.1653   |  |  |  |  |
| 45 | 5.4 | 28,763,804  | 3.0793%  | 99.99%  | 15.9794   | 5.4 | 19,682,236 | 0.0198%  | 96.32%  | 4.9701   |  |  |  |  |
| 46 | 5.4 | 48,033,536  | 10.5088% | 100.00% | 158.1837  | 5.4 | 31,002,196 | 0.0034%  | 81.51%  | 2.4573   |  |  |  |  |
| 47 | 5.4 | 32,374,174  | 6.1377%  | 99.89%  | 17.6006   | 5.4 | 20,075,024 | 0.0017%  | 42.98%  | 0.747    |  |  |  |  |
| 48 | 5.4 | 33,545,522  | 0.8612%  | 95.79%  | 6.1428    | 5.4 | 24,579,728 | 0.0003%  | 8.20%   | 0.1238   |  |  |  |  |
| 49 | 5.4 | 41,228,324  | 1.0147%  | 99.88%  | 18.1782   | 5.4 | 29,981,390 | 0.0003%  | 11.99%  | 0.1741   |  |  |  |  |
| Y1 | 5.4 | 1,267,440   | 56.3684% | 93.93%  | 5.5805    | 5.4 | 751,372    | 0.0527%  | 25.64%  | 0.5249   |  |  |  |  |
| Y2 | 5.4 | 75,641,774  | 86.5550% | 100.00% | 4395.5348 | 5.4 | 5,811,906  | 0.4477%  | 99.98%  | 58.3571  |  |  |  |  |
| Y3 | 5.4 | 40,132,820  | 38.8485% | 100.00% | 145.8907  | 5.4 | 29,519,046 | 0.0144%  | 98.34%  | 9.2615   |  |  |  |  |
| Y4 | 5.4 | 21,566,432  | 11.2625% | 99.85%  | 32.3432   | 5.4 | 22,669,654 | 0.0036%  | 70.52%  | 1.6935   |  |  |  |  |
| Y5 | 5.4 | 9,021,160   | 2.7007%  | 86.56%  | 3.0329    | 5.4 | 8,699,170  | 0.0011%  | 7.99%   | 0.1337   |  |  |  |  |
| Y6 | 5.4 | 18,074,214  | 97.7771% | 100.00% | 968.249   | 5.4 | 18,398     | 30.6175% | 99.58%  | 13.0292  |  |  |  |  |

Input volume: 2.7 µl vs 10.8 µl

Input volume: 2.7 µl vs 5.4 µl

With post-added carrier RNA

RNA extraction with carrier RNA

**Negative Control**

|         |     |            |          |        |        |   |            |         |        |        |  |  |  |  |
|---------|-----|------------|----------|--------|--------|---|------------|---------|--------|--------|--|--|--|--|
| Control | /   | 149,388    | 0.1787%  | 8.26%  | 0.1239 | / | 836,522    | 0.0004% | 0.10%  | 0.0020 |  |  |  |  |
| NC-B1   | 5.4 | 28,506,496 | 0.0097%  | 3.49%  | 0.0423 | ? | 22,207,000 | 0.0000% | 0.49%  | 0.0072 |  |  |  |  |
| NC-B2   | 5.4 | 30,122,844 | 0.0003%  | 4.03%  | 0.0517 | ? | 29,775,692 | 0.0001% | 0.10%  | 0.0060 |  |  |  |  |
| NC-B3   | 5.4 | 71,722,722 | 0.0142%  | 8.11%  | 0.1009 | ? | 24,740,524 | 0.0001% | 0.10%  | 0.0061 |  |  |  |  |
| NC-B4   | 5.4 | 16,824,960 | 0.0092%  | 4.66%  | 0.0607 | ? | 14,371,532 | 0.0000% | 0.00%  | 0.0000 |  |  |  |  |
| NC-B5   | 5.4 | 15,111,452 | 0.0232%  | 3.33%  | 0.0596 | ? | 17,902,254 | 0.0000% | 0.35%  | 0.0070 |  |  |  |  |
| NC-B6   | 5.4 | 31,748,618 | 0.0166%  | 1.45%  | 0.0243 | ? | 29,428,006 | 0.0001% | 0.44%  | 0.0132 |  |  |  |  |
| NC-B7   | 5.4 | 25,058,140 | 0.0096%  | 16.25% | 0.2426 | ? | 29,213,710 | 0.0002% | 0.10%  | 0.0162 |  |  |  |  |
| NC-B8   | 5.4 | 26,839,054 | 0.0003%  | 0.34%  | 0.0067 | ? | 24,241,724 | 0.0001% | 0.10%  | 0.0061 |  |  |  |  |
| NC-T1   | 5.4 | 490,128    | 31.5238% | 4.55%  | 0.1510 | ? | 3,029,996  | 0.1411% | 2.69%  | 0.3196 |  |  |  |  |
| NC-T2   | 5.4 | 40,241,182 | 0.3646%  | 2.48%  | 0.0822 | ? | 30,330,186 | 0.0169% | 1.25%  | 0.3536 |  |  |  |  |
| NC-T3   | 5.4 | 57,892,572 | 0.0009%  | 1.69%  | 0.0662 | ? | 44,494,444 | 0.0093% | 1.22%  | 0.2657 |  |  |  |  |
| NC-T4   | 5.4 | 10,104,442 | 0.0061%  | 0.10%  | 0.0700 | ? | 8,905,284  | 0.0428% | 1.41%  | 0.2725 |  |  |  |  |
| NC-T5   | 5.4 | 9,157,200  | 0.0117%  | 0.24%  | 0.0611 | ? | 9,345,238  | 0.0620% | 1.54%  | 0.3442 |  |  |  |  |
| NC-T6   | 5.4 | 12,384,160 | 0.0023%  | 3.58%  | 0.0569 | ? | 34,626,836 | 0.0143% | 1.43%  | 0.2997 |  |  |  |  |
| NC-T7   | 5.4 | 22,771,792 | 0.0021%  | 1.56%  | 0.0383 | ? | 80,571,702 | 0.0003% | 0.51%  | 0.0706 |  |  |  |  |
| NC-T8   | 5.4 | 2,326,752  | 0.0114%  | 1.40%  | 0.0532 | ? | 12,203,758 | 0.0406% | 1.72%  | 0.2943 |  |  |  |  |
| NC-P1   | 5.4 | 1,983,706  | 22.1787% | 17.89% | 0.4204 | ? | 21,048,464 | 0.0862% | 15.73% | 0.7194 |  |  |  |  |
| NC-P2   | 5.4 | 741,534    | 1.0643%  | 0.56%  | 0.0472 | ? | 6,789,294  | 0.2767% | 2.64%  | 0.5605 |  |  |  |  |
| NC-P3   | 5.4 | 719,086    | 0.0152%  | 0.22%  | 0.0255 | ? | 10,691,944 | 0.1372% | 1.82%  | 0.4917 |  |  |  |  |
| NC-P4   | 5.4 | 25,966,836 | 24.9029% | 37.63% | 1.8097 | ? | 52,143,516 | 0.0357% | 31.96% | 1.1184 |  |  |  |  |
| NC-P5   | 5.4 | 13,752,522 | 66.3305% | 44.61% | 2.2808 | ? | 18,214,848 | 0.0910% | 34.26% | 1.1053 |  |  |  |  |
| NC-P6   | 5.4 | 3,162,132  | 0.0043%  | 2.01%  | 0.0312 | ? | 29,562,108 | 0.0497% | 3.04%  | 0.5153 |  |  |  |  |
| NC-P7   | 5.4 | 1,037,626  | 35.8005% | 10.33% | 0.2497 | ? | 11,182,330 | 0.1426% | 8.13%  | 0.5826 |  |  |  |  |
| NC-P8   | 5.4 | 5,959,374  | 1.1421%  | 2.22%  | 0.0585 | ? | 66,771,636 | 0.0197% | 3.19%  | 0.4318 |  |  |  |  |

Normal human stool

Normal human sputum

Normal human pharyngeal

Table S2, related to Figure 2

| Metagenomic Profiles of MINERVA-m Libraries |             |                |                           |                            |                               |
|---------------------------------------------|-------------|----------------|---------------------------|----------------------------|-------------------------------|
| Sample ID                                   | Human Ratio | Nonhuman Reads | Viral Ratio (to Nonhuman) | Fungal Ratio (to Nonhuman) | Bacterial Ratio (to Nonhuman) |
| 002                                         | 0.189022659 | 494070         | 0.011172506               | 0.04548141                 | 0.523413686                   |
| 003                                         | 0.003152193 | 8023735        | 0.005855752               | 0.018087462                | 0.708748606                   |
| 004                                         | 0.002247542 | 787922         | 0.003186864               | 0.018070317                | 0.759708448                   |
| 005                                         | 0.003376301 | 2361502        | 0.004108402               | 0.036782522                | 0.800813635                   |
| 006                                         | 0.001556586 | 4297298        | 0.02418799                | 0.023355141                | 0.683550454                   |
| 007                                         | 0.002152436 | 3490992        | 0.002329997               | 0.021135826                | 0.804028769                   |
| 008                                         | 0.002496948 | 4366334        | 0.003062752               | 0.022149932                | 0.81782406                    |
| 009                                         | 0.235250651 | 1513285        | 0.417012658               | 0.063244531                | 0.168218809                   |
| 010                                         | 0.100165824 | 292498         | 0.010495798               | 0.050437952                | 0.34255277                    |
| 011                                         | 0.005796999 | 4936618        | 0.002005219               | 0.018073102                | 0.691540443                   |
| 012                                         | 0.056740197 | 2872201        | 0.004992687               | 0.025371483                | 0.68052793                    |
| 013                                         | 0.002099317 | 995977         | 0.003084409               | 0.014818615                | 0.849455359                   |
| 014                                         | 0.07402999  | 1012355        | 0.014750754               | 0.104524599                | 0.300168419                   |
| 015                                         | 0.137521869 | 132205         | 0.029219772               | 0.136674105                | 0.296289853                   |
| 016                                         | 0.128452996 | 919591         | 0.01303623                | 0.157629859                | 0.300164965                   |
| 017                                         | 0.075050746 | 3373926        | 0.004681786               | 0.519567116                | 0.127690708                   |
| 018                                         | 0.004962925 | 273574         | 0.002408855               | 0.300960618                | 0.380547859                   |
| 019                                         | 0.002035641 | 1126424        | 0.001543824               | 0.092432335                | 0.740606557                   |
| 020                                         | 0.002011489 | 226583         | 0.001288711               | 0.275642921                | 0.425058367                   |
| 021                                         | 0.021512964 | 384049         | 0.00883481                | 0.227106437                | 0.434988764                   |
| 022                                         | 0.001262345 | 467215         | 0.001988378               | 0.178305491                | 0.5252036                     |
| 023                                         | 0.000967573 | 2612059        | 0.002827272               | 0.087083791                | 0.6101451                     |
| 024                                         | 0.003675512 | 14482545       | 0.989738061               | 0.004180481                | 0.002953141                   |
| 025                                         | 0.002920678 | 3314711        | 0.002423741               | 0.078022187                | 0.613572948                   |
| 026                                         | 0.004236899 | 1924866        | 0.021695536               | 0.104623906                | 0.691714644                   |
| 027                                         | 0.00113097  | 309059         | 0.005015224               | 0.283327779                | 0.508368952                   |
| 028                                         | 0.862835618 | 1187883        | 0.007710355               | 0.312298433                | 0.17533545                    |
| 029                                         | 0.007660008 | 1480193        | 0.006239051               | 0.120162709                | 0.598969864                   |
| 030                                         | 0.318459812 | 1834920        | 0.004199638               | 0.242711399                | 0.380481438                   |
| 031                                         | 0.004161361 | 1035181        | 0.008846762               | 0.172939805                | 0.437442341                   |
| 032                                         | 0.661264484 | 338880         | 0.011101275               | 0.389633499                | 0.219154273                   |
| 034                                         | 0.016808897 | 835001         | 0.050602335               | 0.027046674                | 0.694854258                   |
| 035                                         | 0.787935399 | 619841         | 0.020623031               | 0.075046665                | 0.115150498                   |
| 036                                         | 0.001534898 | 5513710        | 0.003862916               | 0.041223967                | 0.747251306                   |
| 037                                         | 0.219956548 | 184865         | 0.008086982               | 0.195093717                | 0.4835745                     |
| 038                                         | 0.260678457 | 37991          | 0.144455266               | 0.144165723                | 0.352662473                   |
| 039                                         | 0.411262577 | 263095         | 0.010650145               | 0.096839545                | 0.363526483                   |
| 040                                         | 0.337620057 | 286824         | 0.011466962               | 0.097931135                | 0.36846289                    |
| 041                                         | 0.159757375 | 263758         | 0.022672298               | 0.079171058                | 0.479014855                   |
| 042                                         | 0.523014344 | 71365          | 0.069740069               | 0.099110208                | 0.239879493                   |
| 043                                         | 0.002240742 | 1419615        | 0.0016589                 | 0.034086707                | 0.649658534                   |
| 044                                         | 0.005322417 | 1579626        | 0.001700403               | 0.027012723                | 0.650570451                   |
| 045                                         | 0.002754412 | 1952079        | 0.002996293               | 0.026872888                | 0.653770672                   |
| 046                                         | 0.000702947 | 2672772        | 0.002713288               | 0.024649315                | 0.725376126                   |
| 047                                         | 0.004772987 | 1278475        | 0.001493967               | 0.032775768                | 0.6517296                     |
| 048                                         | 0.001687305 | 2318133        | 0.003838865               | 0.024468829                | 0.707022418                   |
| 049                                         | 0.002643559 | 2696632        | 0.001065032               | 0.02367138                 | 0.646335132                   |
| 050                                         | 0.007682803 | 3220837        | 0.003400979               | 0.02947681                 | 0.6994865                     |
| 051                                         | 0.016305143 | 4544027        | 0.005112866               | 0.021789923                | 0.897927543                   |
| 052                                         | 0.014083711 | 3064879        | 0.00211656                | 0.03112423                 | 0.640877177                   |
| 053                                         | 0.005910151 | 2732709        | 0.001599146               | 0.030647244                | 0.600823944                   |
| 054                                         | 0.002928867 | 3265342        | 0.00610962                | 0.02664897                 | 0.606791877                   |
| 055                                         | 0.001797654 | 3837017        | 0.014074214               | 0.024665254                | 0.635461871                   |
| 056                                         | 0.001543522 | 3581067        | 0.000865385               | 0.022282465                | 0.665598549                   |
| 057                                         | 0.003176819 | 3346679        | 0.004133052               | 0.024325906                | 0.670528306                   |
| 058                                         | 0.022796132 | 638484         | 0.236040371               | 0.078437361                | 0.403385206                   |
| 059                                         | 0.057016346 | 270289         | 0.033819356               | 0.060857083                | 0.284902456                   |
| 060                                         | 0.017012024 | 2339720        | 0.001854495               | 0.025785564                | 0.59654916                    |
| 061                                         | 0.000922177 | 939891         | 0.001568267               | 0.043892324                | 0.639443297                   |
| 062                                         | 0.005408816 | 1399198        | 0.002913097               | 0.033985898                | 0.715117517                   |
| 063                                         | 0.001247926 | 1141437        | 0.00111088                | 0.056198459                | 0.620442477                   |
| 064                                         | 0.001482335 | 1121648        | 0.001077878               | 0.036808339                | 0.582269125                   |
| 065                                         | 0.001927175 | 1167864        | 0.004348965               | 0.042675346                | 0.793624086                   |
| 066                                         | 0.079589675 | 2729856        | 0.010843063               | 0.022070761                | 0.693472843                   |
| 067                                         | 0.002689423 | 1612208        | 0.014605436               | 0.040224959                | 0.627299951                   |
| 068                                         | 0.008419602 | 2602295        | 0.047991869               | 0.025559362                | 0.540959422                   |
| 069                                         | 0.089599293 | 3831180        | 0.493960085               | 0.01486435                 | 0.312107236                   |
| 070                                         | 0.001069733 | 1187881        | 0.00220645                | 0.044801626                | 0.621201114                   |
| 071                                         | 0.068376486 | 2455028        | 0.004898926               | 0.029558115                | 0.731783507                   |
| 072                                         | 0.00499718  | 1036507        | 0.001826326               | 0.032783184                | 0.670467252                   |
| 073                                         | 0.032560807 | 1503578        | 0.012516145               | 0.050292037                | 0.68134144                    |
| 074                                         | 0.001041278 | 1496732        | 0.001725092               | 0.025977931                | 0.811353001                   |
| 075                                         | 0.000682444 | 849815         | 0.00227932                | 0.02841795                 | 0.671447315                   |
| 076                                         | 0.001104006 | 104031         | 0.001278465               | 0.10538205                 | 0.783900953                   |
| 077                                         | 0.001377956 | 664662         | 0.000926787               | 0.0765216                  | 0.695597161                   |
| 078                                         | 0.01292382  | 1170985        | 0.006317758               | 0.076883991                | 0.691229179                   |
| 079                                         | 0.005025328 | 1076912        | 0.00219238                | 0.043353589                | 0.688387723                   |

|     |             |          |             |             |             |
|-----|-------------|----------|-------------|-------------|-------------|
| 080 | 0.497480386 | 65519    | 0.018467925 | 0.16599765  | 0.312825287 |
| 081 | 0.00023917  | 107785   | 0.000129888 | 0.078610196 | 0.764392077 |
| Y1  | 0.245092935 | 73250    | 0.003740614 | 0.036641638 | 0.306197952 |
| Y2  | 0.022313967 | 205752   | 0.070434309 | 0.040475913 | 0.506624448 |
| Y3  | 0.014267506 | 736811   | 0.004001026 | 0.082238186 | 0.543242433 |
| Y4  | 0.039013972 | 989139   | 0.001116122 | 0.051536741 | 0.547061636 |
| Y5  | 0.047463699 | 811926   | 0.001019797 | 0.034744546 | 0.592098295 |
| Y6  | 0.499126321 | 4143     | 0.639150374 | 0.020516534 | 0.09534154  |
| 083 | 0.002700039 | 424059   | 0.003442917 | 0.03267234  | 0.613619803 |
| 085 | 0.002132024 | 1683305  | 0.001428143 | 0.067047861 | 0.747913777 |
| 086 | 0.001808648 | 1998054  | 0.004591968 | 0.041100991 | 0.740861859 |
| 088 | 0.001610477 | 2370305  | 0.004237429 | 0.033140039 | 0.714821088 |
| 089 | 0.125489899 | 6824623  | 0.002909758 | 0.083338523 | 0.612114252 |
| 093 | 0.00148497  | 11315945 | 0.002669154 | 0.019454495 | 0.787331504 |
| 094 | 0.031525493 | 1801276  | 0.002588165 | 0.084962549 | 0.576490221 |
| 095 | 0.002028582 | 9966114  | 0.002931634 | 0.025248959 | 0.789525988 |
| 096 | 0.003554301 | 2728927  | 0.001659993 | 0.023487986 | 0.643969956 |
| 102 | 0.012532408 | 7315003  | 0.002668625 | 0.051052611 | 0.625627631 |
| 113 | 0.267526409 | 1265738  | 0.006691748 | 0.129785943 | 0.412912467 |
| 121 | 0.004616899 | 9471265  | 0.000884676 | 0.027631578 | 0.569689688 |
| 122 | 0.001011443 | 3642880  | 0.00183893  | 0.036619927 | 0.71837612  |
| 123 | 0.001337782 | 727333   | 0.001729607 | 0.037014682 | 0.570275238 |
| 125 | 0.450101208 | 70914    | 0.013213188 | 0.041092027 | 0.358659785 |
| 128 | 0.045390128 | 2512033  | 0.008107776 | 0.039144788 | 0.66629061  |
| 145 | 0.211780262 | 837066   | 0.160462855 | 0.097835774 | 0.180954668 |
| 146 | 0.063735532 | 130696   | 0.003687948 | 0.088923915 | 0.742624105 |
| 147 | 0.153438777 | 271297   | 0.00517514  | 0.053671806 | 0.519342271 |
| 148 | 0.038597722 | 10604568 | 0.002198298 | 0.031893237 | 0.683701684 |
| 149 | 0.13523961  | 4498775  | 0.006449533 | 0.043098177 | 0.496394241 |
| 150 | 0.169917709 | 3665622  | 0.006883688 | 0.072267681 | 0.504646415 |
| 154 | 0.240664459 | 221335   | 0.061987485 | 0.063406149 | 0.223615786 |
| 167 | 0.0012147   | 9913749  | 0.002558467 | 0.027010468 | 0.785593926 |
| 168 | 0.00142026  | 1155851  | 0.002136088 | 0.048642948 | 0.728684753 |
| 169 | 0.060191017 | 107793   | 0.012366295 | 0.076405704 | 0.342304231 |
| 170 | 0.001586528 | 6999442  | 0.0019743   | 0.07589005  | 0.740438309 |
| 174 | 0.191731766 | 2646320  | 0.005560552 | 0.598146483 | 0.185157124 |
| 177 | 0.502751222 | 343623   | 0.024652017 | 0.108156322 | 0.332268213 |
| 180 | 0.002114844 | 1001601  | 0.000532148 | 0.117777438 | 0.601394168 |
| 181 | 0.033779088 | 578560   | 0.002986726 | 0.122637237 | 0.586087873 |
| 182 | 0.012390545 | 624906   | 0.002301146 | 0.198493853 | 0.453301777 |
| 183 | 0.006847255 | 2486586  | 0.001180735 | 0.054931541 | 0.598985115 |
| 184 | 0.000957281 | 6152701  | 0.001215726 | 0.026229619 | 0.544070807 |
| 185 | 0.001434217 | 10373292 | 0.001358103 | 0.020667499 | 0.795980582 |
| 186 | 0.146166134 | 343916   | 0.006681864 | 0.062704265 | 0.470010119 |
| 189 | 0.002723003 | 1873722  | 0.007107244 | 0.062748369 | 0.729391553 |
| 192 | 0.005586001 | 1901991  | 0.002362261 | 0.05567692  | 0.735655952 |
| 193 | 0.003591491 | 13047108 | 0.001417939 | 0.026802951 | 0.583769522 |
| 194 | 0.003134144 | 15221187 | 0.002546451 | 0.015259585 | 0.746436398 |
| 195 | 0.00363156  | 1308850  | 0.009598503 | 0.049409787 | 0.60937235  |
| 202 | 0.010700493 | 2811087  | 0.000547475 | 0.046687989 | 0.364012925 |
| 212 | 0.029842354 | 1346975  | 0.002861226 | 0.035996214 | 0.438361514 |
| 215 | 0.619402321 | 787932   | 0.005943406 | 0.035761969 | 0.235500018 |
| 217 | 0.005447566 | 4264261  | 0.000804125 | 0.046439231 | 0.50423438  |
| 230 | 0.001840298 | 4858865  | 0.040871891 | 0.028553376 | 0.573844921 |
| 234 | 0.583608584 | 181154   | 0.003930358 | 0.026099341 | 0.239602769 |
| 235 | 0.245952364 | 19768    | 0.00252934  | 0.02028531  | 0.222177256 |
| 241 | 0.18030581  | 1320663  | 0.003024239 | 0.029583626 | 0.326096817 |
| 302 | 0.109655167 | 3954842  | 0.001874411 | 0.041846172 | 0.338902287 |
| 303 | 0.002610408 | 13874159 | 0.001691113 | 0.020673109 | 0.688516544 |



Table S3, related to Figure 3

**Metagenomics Co-assembly Statistics**

| Sample         | n Samples | TotalReads | n Contigs | n Bases   | min ContigLength | max ContigLength | ave ContigLength | N50 | UniqMapReads | MultiMapReads | UniqMapRatio | MultiMapRatio |
|----------------|-----------|------------|-----------|-----------|------------------|------------------|------------------|-----|--------------|---------------|--------------|---------------|
| PharyngealSwab | 69        | 199359275  | 273434    | 178540833 | 200              | 86844            | 652              | 800 | 67454202     | 44781114      | 0.338354972  | 0.224625185   |
| Sputum         | 59        | 146500324  | 266932    | 158442390 | 200              | 43382            | 593              | 689 | 50974274     | 33141029      | 0.347946493  | 0.226218128   |
| Faeces         | 33        | 49540839   | 58836     | 34845039  | 200              | 32392            | 592              | 699 | 19330467     | 3547114       | 0.390192564  | 0.071599797   |

Table S4, related to Figure 3

| Mapping Stats of Metagenomics Co-Assembly |          |            |              |               |              |                           |                       |              |               |  |
|-------------------------------------------|----------|------------|--------------|---------------|--------------|---------------------------|-----------------------|--------------|---------------|--|
| SampleType                                | SampleID | TotalReads | UniqMapReads | MultiMapReads | ave Coverage | perc_CoveredScaffolds (%) | perc_CoveredBases (%) | UniqMapRatio | MultiMapRatio |  |
| PharyngealSwab                            | 008      | 4366334    | 1783005      | 1363718       | 3.084        | 12.27                     | 5.93                  | 0.408352865  | 0.312325626   |  |
| PharyngealSwab                            | 009      | 1513285    | 706582       | 16461         | 0.659        | 5.76                      | 2.47                  | 0.466919318  | 0.01087766    |  |
| PharyngealSwab                            | 010      | 292498     | 94369        | 18209         | 0.112        | 7.27                      | 2.46                  | 0.322631266  | 0.062253417   |  |
| PharyngealSwab                            | 011      | 4936618    | 1894918      | 1068398       | 3.053        | 49.12                     | 27.87                 | 0.383849429  | 0.216423065   |  |
| PharyngealSwab                            | 012      | 2872201    | 1229347      | 709968        | 1.781        | 20.6                      | 9.95                  | 0.428015658  | 0.247186043   |  |
| PharyngealSwab                            | 013      | 995977     | 398471       | 285583        | 0.689        | 16.53                     | 7.41                  | 0.400080524  | 0.286736541   |  |
| PharyngealSwab                            | 014      | 1012355    | 411937       | 30936         | 0.398        | 6.5                       | 3.18                  | 0.406909632  | 0.03055845    |  |
| PharyngealSwab                            | 015      | 132205     | 29039        | 2209          | 0.03         | 2.83                      | 0.98                  | 0.219651299  | 0.016708899   |  |
| PharyngealSwab                            | 016      | 919591     | 152510       | 14876         | 0.203        | 5.29                      | 2.28                  | 0.165845468  | 0.016176757   |  |
| PharyngealSwab                            | 017      | 3373926    | 2333580      | 71904         | 2.129        | 7.95                      | 5.09                  | 0.69165121   | 0.021311671   |  |
| PharyngealSwab                            | 025      | 3314711    | 1147369      | 751685        | 2.009        | 42.72                     | 22.93                 | 0.346144506  | 0.226772409   |  |
| PharyngealSwab                            | 037      | 184865     | 35204        | 8377          | 0.043        | 3.28                      | 1.02                  | 0.190430855  | 0.045314148   |  |
| PharyngealSwab                            | 038      | 37991      | 13528        | 1118          | 0.014        | 1.45                      | 0.42                  | 0.356084336  | 0.029428022   |  |
| PharyngealSwab                            | 039      | 263095     | 53347        | 8918          | 0.057        | 4.12                      | 1.34                  | 0.202767061  | 0.033896501   |  |
| PharyngealSwab                            | 040      | 286824     | 59756        | 10008         | 0.065        | 4.57                      | 1.53                  | 0.20833682   | 0.034892478   |  |
| PharyngealSwab                            | 041      | 263758     | 69386        | 30269         | 0.093        | 8.6                       | 2.51                  | 0.263066902  | 0.1147605     |  |
| PharyngealSwab                            | 042      | 71365      | 15896        | 2267          | 0.022        | 2.26                      | 0.69                  | 0.222742241  | 0.031766272   |  |
| PharyngealSwab                            | 043      | 1419615    | 547757       | 310884        | 0.826        | 28.94                     | 13.89                 | 0.38584898   | 0.218991769   |  |
| PharyngealSwab                            | 044      | 1579626    | 595784       | 351913        | 0.952        | 37.62                     | 18.8                  | 0.37716776   | 0.22782481    |  |
| PharyngealSwab                            | 045      | 1952079    | 712994       | 510938        | 1.192        | 36.65                     | 18.98                 | 0.365248538  | 0.261740432   |  |
| PharyngealSwab                            | 046      | 2672772    | 967220       | 731743        | 1.674        | 38.65                     | 19.89                 | 0.361878978  | 0.273776813   |  |
| PharyngealSwab                            | 047      | 1278475    | 427931       | 264408        | 0.691        | 28.04                     | 13.33                 | 0.334719881  | 0.206815151   |  |
| PharyngealSwab                            | 048      | 2318133    | 965852       | 690827        | 1.576        | 14.18                     | 7.53                  | 0.416650813  | 0.29801008    |  |
| PharyngealSwab                            | 049      | 2696632    | 987688       | 664946        | 1.62         | 43.07                     | 22.99                 | 0.366267255  | 0.246583887   |  |
| PharyngealSwab                            | 050      | 3220837    | 1128779      | 1018225       | 1.97         | 32.8                      | 15.7                  | 0.350461386  | 0.316136768   |  |
| PharyngealSwab                            | 051      | 4544027    | 1514724      | 1755654       | 2.984        | 22.84                     | 9.44                  | 0.33334397   | 0.386365222   |  |
| PharyngealSwab                            | 052      | 3064879    | 1079983      | 833390        | 1.748        | 37.8                      | 17.76                 | 0.35237378   | 0.271916118   |  |
| PharyngealSwab                            | 053      | 2732709    | 1086150      | 586272        | 1.529        | 40.51                     | 20.17                 | 0.397462738  | 0.21453876    |  |
| PharyngealSwab                            | 054      | 3265342    | 1392790      | 745293        | 1.959        | 35.92                     | 18.71                 | 0.426537251  | 0.228243473   |  |
| PharyngealSwab                            | 055      | 3837017    | 1481664      | 1037941       | 2.307        | 41.85                     | 22.06                 | 0.38614997   | 0.270507272   |  |
| PharyngealSwab                            | 056      | 3581067    | 1744283      | 644864        | 2.177        | 37.1                      | 18.75                 | 0.487084715  | 0.180075938   |  |
| PharyngealSwab                            | 057      | 3346679    | 1183773      | 973519        | 2.025        | 34.33                     | 17.5                  | 0.353715728  | 0.290891059   |  |
| PharyngealSwab                            | 072      | 1036507    | 290346       | 285954        | 0.552        | 22.4                      | 9.19                  | 0.280119671  | 0.275882363   |  |
| PharyngealSwab                            | 080      | 65519      | 13976        | 2993          | 0.017        | 1.83                      | 0.6                   | 0.213312169  | 0.045681405   |  |
| PharyngealSwab                            | 073      | 1503578    | 506083       | 320679        | 0.779        | 16.79                     | 8.06                  | 0.336585797  | 0.213277263   |  |
| PharyngealSwab                            | 074      | 1496732    | 435717       | 548667        | 0.899        | 24.6                      | 10.15                 | 0.291112237  | 0.366576648   |  |
| PharyngealSwab                            | 075      | 849815     | 308377       | 194762        | 0.487        | 22.15                     | 10.18                 | 0.362875449  | 0.229181645   |  |
| PharyngealSwab                            | 078      | 1170985    | 697111       | 52100         | 0.665        | 6.59                      | 3.68                  | 0.595320179  | 0.04492457    |  |
| PharyngealSwab                            | 089      | 6824623    | 3475088      | 240955        | 3.47         | 6.88                      | 5.89                  | 0.50919853   | 0.035306712   |  |
| PharyngealSwab                            | 093      | 11315945   | 3723595      | 4628299       | 7.239        | 38.03                     | 20.98                 | 0.329057361  | 0.409006848   |  |
| PharyngealSwab                            | 094      | 1801276    | 504405       | 375116        | 0.748        | 20.11                     | 8.13                  | 0.280026492  | 0.208250152   |  |
| PharyngealSwab                            | 095      | 9966114    | 4341011      | 3493745       | 6.604        | 30.68                     | 17.76                 | 0.435577097  | 0.350562416   |  |
| PharyngealSwab                            | 096      | 2728927    | 1009847      | 881358        | 1.65         | 25.08                     | 13.03                 | 0.370052772  | 0.322968698   |  |
| PharyngealSwab                            | 113      | 1265738    | 257605       | 85145         | 0.276        | 4.04                      | 1.73                  | 0.203521582  | 0.067269056   |  |
| PharyngealSwab                            | 125      | 70914      | 14436        | 765           | 0.013        | 1.71                      | 0.49                  | 0.203570522  | 0.010787715   |  |
| PharyngealSwab                            | 148      | 10604568   | 3733956      | 3290346       | 6.143        | 50.06                     | 29.35                 | 0.352108261  | 0.310276288   |  |
| PharyngealSwab                            | 154      | 221335     | 53814        | 2635          | 0.056        | 2.81                      | 0.91                  | 0.243133711  | 0.011905031   |  |
| PharyngealSwab                            | 167      | 9913749    | 3650945      | 3243359       | 6.44         | 42.72                     | 24.44                 | 0.368270873  | 0.327157668   |  |
| PharyngealSwab                            | 169      | 107793     | 46761        | 5015          | 0.045        | 2.31                      | 1.05                  | 0.433803679  | 0.046524357   |  |
| PharyngealSwab                            | 181      | 578560     | 198491       | 13459         | 0.211        | 4.77                      | 3.33                  | 0.343077641  | 0.023262929   |  |
| PharyngealSwab                            | 182      | 624906     | 76894        | 15046         | 0.106        | 2.26                      | 0.68                  | 0.123048907  | 0.024077221   |  |
| PharyngealSwab                            | 184      | 6152701    | 2514518      | 1565590       | 3.73         | 44.07                     | 25.25                 | 0.408685226  | 0.254455726   |  |
| PharyngealSwab                            | 186      | 343916     | 101216       | 44941         | 0.123        | 7.37                      | 2.61                  | 0.294304423  | 0.130674351   |  |
| PharyngealSwab                            | 193      | 13047108   | 4609877      | 4271399       | 7.492        | 47.5                      | 27.86                 | 0.35332558   | 0.327382819   |  |
| PharyngealSwab                            | 215      | 787932     | 230204       | 43440         | 0.201        | 6.81                      | 4.21                  | 0.292162268  | 0.055131661   |  |
| PharyngealSwab                            | 234      | 181154     | 69388        | 13051         | 0.055        | 4.23                      | 2.02                  | 0.38303322   | 0.072043676   |  |
| PharyngealSwab                            | 235      | 19768      | 4724         | 546           | 0.005        | 1.13                      | 0.29                  | 0.238972076  | 0.027620397   |  |
| PharyngealSwab                            | 241      | 1320663    | 575223       | 98715         | 0.523        | 10.11                     | 7                     | 0.435556232  | 0.074746548   |  |
| PharyngealSwab                            | 302      | 3954842    | 2470321      | 175206        | 2.172        | 11.38                     | 9                     | 0.624632033  | 0.044301643   |  |
| PharyngealSwab                            | 303      | 13874159   | 4517530      | 5327147       | 8.503        | 45.94                     | 26.32                 | 0.325607484  | 0.383961795   |  |
| PharyngealSwab                            | NC-P1    | 2661398    | 761          | 398           | 0.275        | 13.4                      | 6.75                  | 0.00028594   | 0.000149545   |  |
| PharyngealSwab                            | NC-P2    | 2330412    | 170          | 446           | 0.228        | 8.77                      | 5.92                  | 7.29E-05     | 0.000191382   |  |
| PharyngealSwab                            | NC-P3    | 2161861    | 624          | 355           | 0.262        | 12.93                     | 6.96                  | 0.00028864   | 0.00016421    |  |
| PharyngealSwab                            | NC-P4    | 4137917    | 3656         | 445           | 0.669        | 23.82                     | 10.31                 | 0.000883536  | 0.000107542   |  |
| PharyngealSwab                            | NC-P5    | 2511179    | 798          | 280           | 0.312        | 17.32                     | 8.26                  | 0.000317779  | 0.000111501   |  |
| PharyngealSwab                            | NC-P6    | 2830752    | 1927         | 327           | 0.397        | 22.62                     | 9.81                  | 0.000680738  | 0.000115517   |  |
| PharyngealSwab                            | NC-P7    | 2242409    | 309          | 358           | 0.223        | 12.73                     | 6.35                  | 0.000137798  | 0.00015965    |  |
| PharyngealSwab                            | NC-P8    | 3485836    | 3461         | 244           | 0.582        | 22.23                     | 9.43                  | 0.00092875   | 7.00E-05      |  |
| Sputum                                    | 002      | 494070     | 140944       | 75071         | 0.227        | 13.21                     | 5.32                  | 0.285271318  | 0.151944057   |  |
| Sputum                                    | 003      | 8023735    | 3356679      | 1723799       | 5.828        | 35.7                      | 24.18                 | 0.418343702  | 0.214837479   |  |
| Sputum                                    | 004      | 787922     | 281106       | 203174        | 0.571        | 17.49                     | 8.52                  | 0.356768817  | 0.25786055    |  |
| Sputum                                    | 005      | 2361502    | 931296       | 528019        | 1.64         | 17.29                     | 9.45                  | 0.394365959  | 0.22359456    |  |
| Sputum                                    | 006      | 4297298    | 1795018      | 912860        | 3.062        | 28.97                     | 17.61                 | 0.417708523  | 0.212426506   |  |
| Sputum                                    | 007      | 3490992    | 1254702      | 1119251       | 2.656        | 7.31                      | 3.83                  | 0.359411308  | 0.320611162   |  |
| Sputum                                    | 023      | 2612059    | 714059       | 635651        | 1.643        | 33.87                     | 17.88                 | 0.273370165  | 0.243352466   |  |
| Sputum                                    | 026      | 1924866    | 589166       | 504226        | 1.299        | 31.7                      | 16.72                 | 0.306081566  | 0.261953819   |  |
| Sputum                                    | 028      | 1187883    | 200546       | 108134        | 0.354        | 1.76                      | 0.53                  | 0.168826391  | 0.091030851   |  |
| Sputum                                    | 029      | 1480193    | 461446       | 297838        | 0.922        | 30.59                     | 15.56                 | 0.311747184  | 0.201215652   |  |
| Sputum                                    | 030      | 1834920    | 321218       | 180026        | 0.675        | 19.28                     | 7.72                  | 0.175058313  | 0.098111089   |  |
| Sputum                                    | 032      | 338880     | 28743        | 10370         | 0.047        | 1.9                       | 0.53                  | 0.084817635  | 0.030600803   |  |
| Sputum                                    | 034      | 835001     | 316709       | 247425        | 0.598        | 21.54                     | 10.63                 | 0.379291761  | 0.29631701    |  |
| Sputum                                    | 035      | 619841     | 27798        | 6465          | 0.036        | 2.71                      | 0.74                  | 0.044846985  | 0.010430094   |  |
| Sputum                                    | 036      | 5513710    | 1593407      | 1807549       | 3.766        | 22.93                     | 13.15                 | 0.28898999   | 0.327828087   |  |
| Sputum                                    | 060      | 2339720    | 933470       | 601315        | 1.412        | 38.56                     | 19.19                 | 0.398966543  | 0.257002975   |  |
| Sputum                                    | 061      | 939891     | 330917       | 239703        | 0.591        | 20.02                     | 10.23                 | 0.352080188  | 0.255032764   |  |
| Sputum                                    | 062      | 1399198    | 526859       | 389053        | 0.953        | 28.34                     | 14.13                 | 0.376543563  | 0.278054285   |  |
| Sputum                                    | 063      | 1141437    | 359801       | 176564        | 0.614        | 31.08                     | 14                    | 0.315217572  | 0.154685716   |  |

|        |       |          |         |         |        |       |       |              |             |
|--------|-------|----------|---------|---------|--------|-------|-------|--------------|-------------|
| Sputum | 064   | 1121648  | 335683  | 232574  | 0.658  | 27.69 | 13.21 | 0.2992766    | 0.207350256 |
| Sputum | 065   | 1167864  | 330975  | 412004  | 0.787  | 13.71 | 6.13  | 0.283402006  | 0.352784228 |
| Sputum | 066   | 2729856  | 1375266 | 277463  | 1.729  | 19.76 | 14.57 | 0.503787013  | 0.10164016  |
| Sputum | 067   | 1612208  | 545788  | 367380  | 1.027  | 31.21 | 15.62 | 0.338534482  | 0.227873823 |
| Sputum | 068   | 2602295  | 1134835 | 613140  | 1.778  | 42.34 | 22.58 | 0.436090067  | 0.235615101 |
| Sputum | 069   | 3831180  | 2491631 | 454648  | 2.924  | 37    | 20.08 | 0.650356026  | 0.118670488 |
| Sputum | 070   | 1187881  | 387497  | 262701  | 0.737  | 28.28 | 14.08 | 0.326208602  | 0.22115094  |
| Sputum | 071   | 2455028  | 818077  | 835395  | 1.677  | 24.94 | 13.97 | 0.33322512   | 0.340279215 |
| Sputum | 079   | 1076912  | 338675  | 233563  | 0.66   | 28.09 | 13.56 | 0.314487163  | 0.216882159 |
| Sputum | Y1    | 73250    | 27204   | 4874    | 0.035  | 3.9   | 1.15  | 0.371385666  | 0.066539249 |
| Sputum | Y2    | 205752   | 81647   | 18825   | 0.104  | 8.73  | 3.31  | 0.396822388  | 0.091493643 |
| Sputum | Y3    | 736811   | 235949  | 84960   | 0.345  | 13.81 | 5.74  | 0.320230018  | 0.115307725 |
| Sputum | Y4    | 989139   | 472515  | 73394   | 0.555  | 12.51 | 6.06  | 0.4777703336 | 0.074199885 |
| Sputum | Y5    | 811926   | 356758  | 90023   | 0.482  | 14.48 | 7.07  | 0.439397186  | 0.110875868 |
| Sputum | Y6    | 4143     | 2371    | 28      | 0.002  | 0.07  | 0.04  | 0.572290611  | 0.006758388 |
| Sputum | 083   | 424059   | 122192  | 96275   | 0.209  | 17.21 | 5.82  | 0.288148583  | 0.227032088 |
| Sputum | 085   | 1683305  | 692954  | 332272  | 1.121  | 7.82  | 4.2   | 0.411662771  | 0.197392629 |
| Sputum | 086   | 1998054  | 654106  | 581458  | 1.293  | 19.38 | 10.09 | 0.327371533  | 0.291012155 |
| Sputum | 088   | 2370305  | 799537  | 638923  | 1.669  | 28.16 | 15.63 | 0.337313974  | 0.269553074 |
| Sputum | 102   | 7315003  | 2357669 | 1791322 | 4.195  | 39.03 | 23.94 | 0.322305951  | 0.24488329  |
| Sputum | 121   | 9471265  | 4566208 | 1657183 | 6.127  | 49.56 | 33.47 | 0.482111735  | 0.174969553 |
| Sputum | 128   | 2512033  | 1034440 | 732061  | 1.632  | 21.56 | 11.45 | 0.411793953  | 0.291421729 |
| Sputum | 147   | 271297   | 93885   | 62114   | 0.144  | 10.22 | 3.33  | 0.346059853  | 0.228952034 |
| Sputum | 150   | 3665622  | 1199211 | 757308  | 1.759  | 31.83 | 14.34 | 0.327150754  | 0.206597407 |
| Sputum | 168   | 1155851  | 366957  | 157751  | 0.651  | 23.35 | 12.04 | 0.317477772  | 0.136480394 |
| Sputum | 170   | 6999442  | 2409604 | 2003490 | 4.79   | 29.39 | 18.78 | 0.344256585  | 0.286235674 |
| Sputum | 174   | 2646320  | 1707227 | 78442   | 1.816  | 8.78  | 5.54  | 0.645132486  | 0.029641918 |
| Sputum | 177   | 343623   | 76152   | 9862    | 0.106  | 4.4   | 1.58  | 0.221614968  | 0.028700058 |
| Sputum | 183   | 2486586  | 858556  | 351550  | 1.293  | 19.53 | 10.62 | 0.345275008  | 0.141378581 |
| Sputum | 185   | 10373292 | 3598872 | 3603825 | 7.792  | 41.64 | 27.68 | 0.346936344  | 0.34741382  |
| Sputum | 194   | 15221187 | 5907981 | 5822870 | 11.38  | 37.91 | 25.07 | 0.388141937  | 0.382550323 |
| Sputum | 217   | 4264261  | 1406016 | 733694  | 2.036  | 42.67 | 20.77 | 0.329720906  | 0.172056542 |
| Sputum | NC-T1 | 638736   | 114     | 100     | 0.051  | 8.33  | 2.64  | 0.000178477  | 0.000156559 |
| Sputum | NC-T2 | 1565794  | 3548    | 409     | 0.294  | 20.71 | 7.85  | 0.002265943  | 0.000261209 |
| Sputum | NC-T3 | 1649872  | 4471    | 459     | 0.322  | 25.62 | 8.52  | 0.002709907  | 0.000278203 |
| Sputum | NC-T4 | 765516   | 1161    | 113     | 0.108  | 15.6  | 4.65  | 0.001516624  | 0.000147613 |
| Sputum | NC-T5 | 894809   | 832     | 157     | 0.086  | 15    | 3.84  | 0.000929807  | 0.000175456 |
| Sputum | NC-T6 | 1679014  | 3487    | 510     | 0.337  | 26.34 | 9.17  | 0.002076814  | 0.000303375 |
| Sputum | NC-T7 | 2798816  | 9028    | 1199    | 0.595  | 31.11 | 11.29 | 0.00322565   | 0.000428395 |
| Sputum | NC-T8 | 1077251  | 1311    | 217     | 0.141  | 16.55 | 5.51  | 0.001216987  | 0.000201439 |
| Stool  | 018   | 273574   | 31308   | 4239    | 0.219  | 9.42  | 4.34  | 0.1144407    | 0.015494894 |
| Stool  | 019   | 1126424  | 498848  | 200522  | 3.608  | 20.41 | 15.96 | 0.442859882  | 0.178016449 |
| Stool  | 020   | 226583   | 28809   | 1543    | 0.202  | 10.71 | 4.34  | 0.127145461  | 0.006809867 |
| Stool  | 021   | 384049   | 84715   | 16479   | 0.548  | 15.86 | 8.68  | 0.220583832  | 0.042908587 |
| Stool  | 022   | 467215   | 146894  | 42618   | 1.048  | 14.92 | 11.15 | 0.314403433  | 0.091217106 |
| Stool  | 024   | 14482545 | 9653002 | 1290951 | 56.071 | 1.88  | 0.66  | 0.666526636  | 0.089138408 |
| Stool  | 027   | 309059   | 49144   | 8974    | 0.347  | 14.78 | 7.74  | 0.15901171   | 0.029036527 |
| Stool  | 031   | 1035181  | 317176  | 41209   | 1.964  | 32.85 | 25.21 | 0.306396659  | 0.039808497 |
| Stool  | 058   | 638484   | 177979  | 10781   | 0.862  | 7.94  | 2.79  | 0.278752482  | 0.01688531  |
| Stool  | 059   | 270289   | 48843   | 6183    | 0.207  | 3.8   | 1.1   | 0.180706577  | 0.022875515 |
| Stool  | 076   | 104031   | 4211    | 2274    | 0.052  | 1.07  | 0.25  | 0.040478319  | 0.021858869 |
| Stool  | 077   | 664662   | 113871  | 36679   | 0.792  | 18.79 | 11.39 | 0.171321664  | 0.05518444  |
| Stool  | 081   | 107785   | 11233   | 4263    | 0.11   | 2.82  | 1.2   | 0.104216728  | 0.039550958 |
| Stool  | 122   | 3642880  | 1711348 | 290582  | 8.92   | 33.04 | 29.73 | 0.469778856  | 0.079767107 |
| Stool  | 123   | 727333   | 257616  | 73089   | 1.471  | 20.68 | 15    | 0.354192646  | 0.100489047 |
| Stool  | 145   | 837066   | 449395  | 46805   | 2.163  | 4.04  | 2.09  | 0.536869255  | 0.055915543 |
| Stool  | 146   | 130696   | 13406   | 8797    | 0.081  | 2.71  | 0.86  | 0.102573912  | 0.067308869 |
| Stool  | 149   | 4498775  | 1977149 | 341414  | 9.221  | 33.89 | 27.56 | 0.439486082  | 0.075890437 |
| Stool  | 180   | 1001601  | 119940  | 37646   | 0.815  | 7.17  | 2.1   | 0.119748283  | 0.037585825 |
| Stool  | 189   | 1873722  | 220255  | 167417  | 1.312  | 11.88 | 5.86  | 0.117549455  | 0.089349968 |
| Stool  | 192   | 1901991  | 443243  | 158658  | 2.373  | 22.87 | 15.51 | 0.233041586  | 0.083416799 |
| Stool  | 195   | 1308850  | 192020  | 108721  | 1.105  | 15.14 | 8.04  | 0.146708943  | 0.08306605  |
| Stool  | 202   | 2811087  | 238038  | 118490  | 1.212  | 17.42 | 6.47  | 0.084678276  | 0.042150954 |
| Stool  | 212   | 1346975  | 212864  | 31493   | 1.005  | 20.97 | 10.81 | 0.158031144  | 0.023380538 |
| Stool  | 230   | 4858865  | 2325941 | 497281  | 12.012 | 44.62 | 35.58 | 0.478700478  | 0.102345095 |
| Stool  | NC-B1 | 274121   | 329     | 0       | 0.121  | 19.35 | 4.5   | 0.0012002    | 0           |
| Stool  | NC-B2 | 494231   | 498     | 3       | 0.373  | 27.44 | 11.57 | 0.001007626  | 6.07E-06    |
| Stool  | NC-B3 | 1395918  | 499     | 0       | 0.905  | 52.17 | 26.62 | 0.000357471  | 0           |
| Stool  | NC-B4 | 243923   | 397     | 1       | 0.174  | 24.49 | 8.5   | 0.001627563  | 4.10E-06    |
| Stool  | NC-B5 | 1204783  | 297     | 1       | 1.998  | 13.38 | 3.07  | 0.000246517  | 8.30E-07    |
| Stool  | NC-B6 | 347233   | 433     | 0       | 0.22   | 23.68 | 7.26  | 0.001247001  | 0           |
| Stool  | NC-B7 | 291237   | 335     | 0       | 0.074  | 9.35  | 1.9   | 0.001150266  | 0           |
| Stool  | NC-B8 | 259671   | 431     | 1       | 0.179  | 21.16 | 7.22  | 0.001659793  | 3.85E-06    |
