# Supplementary material
Source: PubMed Central journal article supplement (PMC7678446)
Supplement: mmc2.pdf [file mmc2.pdf]

Supplementary Appendix - Protocol

**Protocol: MINERVA – a rapid library construction method to  
sequence SARS-CoV-2 gRNA**

**Version 1.1**

**April 23, 2020**

## Materials

### REAGENTS

- RNaseZap (Ambion, Cat. No. AM9780)
- DNA-OFF (Takara Bio, Cat. No. 9036)
- QIAamp Viral RNA Mini Kit (Qiagen, Cat. No. 52906)
- MGIEasy rRNA removal kit (BGI, Cat. No. 1000005953)
- DNase I (RNase-free) (NEB, Cat.No.M0303)
- Tris-HCl (1M, pH 7.6; ROCKLAND, Cat. No. MB-003)
- MgCl<sub>2</sub> (1 M; Invitrogen, Cat. No. AM9530G)
- N,N-Dimethylformamide (for molecular biology, ≥99%; Sigma, Cat. No. D4551)
- DPEC-treated water (Invitrogen, Cat. No. AM9915G)
- Recombinant RNase Inhibitor (40 U/μl; Takara, Cat. No. 2313)
- Deoxynucleotide (dNTP) Solution Set (NEB, Cat. No. N0446S)
- Superscript II reverse transcriptase (Invitrogen, Cat. No. 18064014)
- DTT (0.1M; Invitrogen, Cat. No. 18064014)
- Betaine solution (5 M; Sigma, Cat. No. B0300)
- TruePrep DNA Library Prep Kit V2 for Illumina (Vazyme, Cat. No. TD501)
- PEG8000 (VWR Life Science, Cat.No.97061)
- ATP (10 mM; NEB, Cat. No. P0756)
- Q5 High-Fidelity 2x Master Mix (NEB, Cat. No. M0492)
- ChamQ SYBR qPCR master mix (Vazyme, Cat. No. Q311-02)
- VAHTS DNA Clean Beads (Vazyme, Cat. No. N411)
- Ethanol (200 proof, for molecular biology; Sigma, Cat. No. E7023)
- TargetSeq One Cov Kit (iGeneTech, Cat. No. 502002-V1)
- xGen Universal Blockers (IDT, Cat.No. 1079586)
- All oligos were acquired from Sangon.

### SUPPLIES

- Millex-GP Syringe Filter Unit (0.22 μm, polyethersulfone; Millipore, Cat. No. SLGP033RB)
- 0.2 mL Thin Wall PCR Tubes (Axygen, Cat. No. PCR-02-C)

### EQUIPMENT

- Thermo cycler
- Magnetic stand
- Vortexer
- Real-Time PCR machine
- A compatible Illumina DNA sequencing instrument

### REAGENT SETUP

- **SARS-Cov-2 infected samples**

SARS-Cov-2 infected samples, including pharyngeal swabs, sputum samples or stool samples are collected following clinical guidelines. All of the samples, or their viral transfer media, must be deactivated at 56 °C for 30 min before nucleic acid extraction.

**IMPORTANT NOTE:** All the procedure should be operated in a BSL-3 laboratory before the total RNA is ready.

- **Total RNA**

Total RNA can be extracted from SARS-Cov-2 infected samples by QIAamp Viral RNA Mini Kit, while omitting the addition of carrier RNA if possible. Then use MGIEasy rRNA removal kit to remove the ribosomal RNA, and DNase I to remove the DNA. The final elution volume is 12-20 µl for each sample.

**IMPORTANT NOTE:** All the procedure should be operated in a BSL-3 laboratory before the total RNA is ready.

- **Oligo dT primer**

Oligo dT primer (5'-T<sub>30</sub>VN-3') anneals to all the RNAs containing a poly(A) tail. 'N' is any base and 'V' is either A, C or G. Dissolve the oligonucleotide in DPEC-treated water, to a final concentration of 100 µM. The oligo solution can be stored at -20 °C for at least 6 months.

- **Random decamer primer**

Random decamer primer (5'-N<sub>10</sub>-3') anneals to the RNA randomly. 'N' represents any base. Dissolve the oligonucleotide in DPEC-treated water, to a final concentration of 100 µM. The oligo solution can be stored at -20 °C for at least 6 months.

- **dNTP mix**

Combine equal volume of dATP, dTTP, dCTP, dGTP in Deoxynucleotide (dNTP) Solution Set.

- **5X TD Buffer**

50 mM Tris-HCl, 25 mM MgCl<sub>2</sub>, 50% N,N-Dimethylformamide (DMF). This buffer can be stored at 4°C for at least 6 months.

- **N-ch-F primer**

N-ch-F primer (5'-GGGGAAGTTCTCTGCTAGAAT-3') is the forward primer used to amplify the N region of SARS-Cov-2 in qPCR. Dissolve the oligonucleotide in DPEC-treated water, to a final concentration of 100 µM. The oligo solution can be stored at -20 °C for at least 6 months.

- **N-ch-R primer**

N-ch-R primer (5'-CAGACATTTTGCTCTCAAGCTG-3') is the reverse primer that used to amplify the N region of SARS-Cov-2 in qPCR. Dissolve the oligonucleotide in DPEC-treated water, to a final concentration of 100 µM. The oligo solution can be stored at -20 °C for at least 6 months.

## Procedure

- 1) Clean the work space, including the hood and pipettes, with DNA-off and RNase-Zap. Filter the self-made buffer with 0.22 µm filter. Use a thermal cycler with a heated lid set to 105 °C for all incubations throughout this protocol. All reaction mixes should be set up on ice.

**IMPORTANT NOTE:** All the procedure should be operated in a BSL-3 laboratory before the total RNA is ready.

### Reverse transcription

- 2) Prepare preRT mix on ice by adding 0.2  $\mu$ l RNase Inhibitor (40U/ $\mu$ l), 0.2  $\mu$ l Oligo dT (100  $\mu$ M), 2  $\mu$ l (N)<sub>10</sub> random primer (100  $\mu$ M), 0.8  $\mu$ l dNTP mix (25 mM) to 5.4  $\mu$ l total RNA.

**NOTE:** If the volume of the RNA sample is more or less than 5.4  $\mu$ l, please scale up or down the whole reaction volume proportionally.

- 3) Mix the reaction gently and thoroughly without bubbles and incubate it at 72°C for 3 min, then quickly cool it on ice.
- 4) Prepare RT mix by combining the reagents in the table below.

| Component                                            | Volume ( $\mu$ l) | Final concentration |
|------------------------------------------------------|-------------------|---------------------|
| SuperScript II reverse transcriptase (200U/ $\mu$ l) | 1.00              | 200 U               |
| RNase Inhibitor (40U/ $\mu$ l)                       | 0.50              | 20 U                |
| SuperScript II first strand buffer (5x)              | 4.00              | 1x                  |
| DTT (0.1M)                                           | 1.00              | 5 mM                |
| Betaine (5M)                                         | 4.00              | 1 M                 |
| MgCl <sub>2</sub> (1M)                               | 0.12              | 6 mM                |
| DPEC water                                           | 0.78              | -                   |
| Total Volume                                         | 11.40             | -                   |

- 5) Add 11.40  $\mu$ l RT mix to the samples from step 3 and gently pipette without bubbles. Incubate the reaction at 42°C for 1.5 hour for reverse transcription, and followed by 70°C 15min to inactivate SuperScript II reverse transcriptase. Then put the sample on ice.

### Tagmentation

- 6) Dissolve PEG8000 powder to DPEC-treated water with concentration of 40% (w/w), and filter the solution by 0.22  $\mu$ m filter.
- 7) Prepare the tagmentation mix by combining the reagents listed below.

| Component                              | Volume ( $\mu$ l) | Final concentration |
|----------------------------------------|-------------------|---------------------|
| V50 (TruePrep DNA Library Prep Kit V2) | 1.00              | -                   |
| 5xTD buffer                            | 8.00              | 1x                  |
| RNase Inhibitor (40U/ $\mu$ l)         | 1.00              | 40 U                |
| 40% PEG8000                            | 3.40              | 3.4%                |
| ATP (10 mM)                            | 4.00              | 1.00 mM             |
| DPEC water                             | 2.60              | -                   |
| Total Volume                           | 20.00             | -                   |

- 8) Add the tagmentation mix to the sample from step 5. Pipette the reaction gently and thoroughly. Incubate the reaction at 55°C for 30 min, then cool it on ice.

### Amplification and Sample Pooling

- 9) Add 0.8 µl SuperScript II reverse transcriptase and 40.8 µl Q5 High-Fidelity 2x Master Mix to the tagmentation products.
- 10) Mix the reaction well without forming bubbles. Incubate the reaction at 42°C for 15 min to fill the 9 bp gap left by Tn5 transposome, followed by 70°C 15 min to inactivate SuperScript II reverse transcriptase.
- 11) Prepare the PCR mix by combining 4 µl N6xx index primer (10 µM), 4 µl N8xx index primer (10 µM) and 8 µl Q5 High-Fidelity 2x Master Mix. The final concentration of each index primer is around 0.4 µM.
- 12) Add PCR mix to the sample from step 10 and pipette thoroughly. Perform PCR as detailed below.

| Cycle | Denature   | Anneal     | Extension   | Hold |
|-------|------------|------------|-------------|------|
| 1     | 98°C, 30 s | -          | -           |      |
| 2-19  | 98°C, 20 s | 60°C, 20 s | 72°C, 2 min |      |
| 20    | -          | -          | 72°C, 5 min |      |
| 21    | -          | -          | -           | 4°C  |

- 13) For targeted SARS-CoV-2 deep sequencing, continue with **qPCR and Sample Pooling**. For metagenomic sequencing, pool 8-16 libraries in equal volumes and go to **Step 18**.

#### qPCR and Sample Pooling

- 14) Take 1 µl PCR product and dilute it 200-fold with nuclease-free water.
- 15) Prepare qPCR mix by adding 0.05 µl N-ch-F primer (100 µM), 0.05 µl N-ch-R primer (100 µM), 5 µl ChamQ SYBR qPCR master mix and 3.9 µl nuclease-free water to 1 µl diluted template.
- 16) The program of qPCR is performed at 95°C for 60s, followed by 40 cycles of [95°C 5s, 60°C 15s].
- 17) Pool 8-16 libraries together according to their Ct values as following:

| Ct    | Volume taken (µl) |
|-------|-------------------|
| >28   | 50.0              |
| 24-28 | 16.0              |
| 20-24 | 3.0               |
| <20   | 0.5               |

#### Purification

- 18) Place VATHS DNA clean beads at room temperature for 15 min, then vortex violently.
- 19) Add equal volume of beads (1x) to the pooled samples and vortex violently. Incubate the mixture at room temperature for 5 min.
- 20) Transfer the tube to compatible magnetic stand until the solution is clear.
- 21) Carefully remove the solution without disturbing beads.
- 22) Wash beads with 200 µl 80% ethanol (freshly prepared) and incubate for 30 s, then remove the ethanol. Repeat this step one more time.
- 23) Dry the beads on magnetic stand with cap open until the color of beads gets light. Add 52

µl nuclease-free water and close the cap, vortex violently to wash DNA off.

- 24) Incubate the tube at room temperature for 5 min off the magnet stand.
- 25) Quickly spin down the tube then place it on magnetic stand until the solution is clear.
- 26) Carefully aspirate 50 µl supernatant to a clean tube without disturbing beads. The library can be restored at -20°C for 6 months.

**IMPORTANT NOTE:** The equal-volume mixed libraries are now ready for sequencing.

#### **SARS-Cov-2 Sequence Enrichment**

- 27) Subject the purified Ct-adjusted library pool to one round of SARS-Cov-2 sequence capture following the instruction of TargetSeq One Cov Kit. Replace the iGeneTech Blocker with the IDT xGen Universal Blockers.

#### **High-Throughput Sequencing**

- 28) Both the metagenomic library and the SARS-Cov-2 targeted library can be sequenced on any Illumina platform with paired-end mode. 10-20 million reads are typically collected.
